# Supplementary material for: Remarkable increase in the rate of the catalytic epoxidation of electron deficient styrenes through the addition of Sc(OTf)3 to the MnTMTACN catalyst
Source: Royal Society of Chemistry journal article supplement (doi:10.1039/c7cc09698d), 2018-01-01
Supplement: c7cc09698d1.pdf [file c7cc09698d1.pdf]

**Remarkable increase in the rate of the catalytic epoxidation of  
electron deficient styrenes through the addition of Sc(OTf)<sub>3</sub> to the  
MnTMTACN catalyst**

Aneta Nodzewska<sup>a,b</sup> and Michael Watkinson<sup>a\*</sup>

<sup>a</sup>*School of Biological and Chemical Sciences, Queen Mary University of London, Mile End Road,  
London, E1 4NS, UK*

<sup>b</sup>*University of Białystok, ul. Ciołkowskiego 1K, 15-245 Białystok, Poland*

**Electronic Supporting Information**

## Table of Contents

|                                                                                                                                                                                                          |    |
|----------------------------------------------------------------------------------------------------------------------------------------------------------------------------------------------------------|----|
| <b>Figure ES1.</b> The <sup>1</sup> H NMR spectra of the catalytic oxidation of 4-fluorostyrene performed in MeCN-d <sub>3</sub> .                                                                       | 4  |
| <b>Figure ES2.</b> The UV-VIS spectra of <b>1</b> and the mixtures with Sc(OTf) <sub>3</sub> in MeCN at different concentrations.....                                                                    | 5  |
| <b>Figure ES3.</b> UV-VIS spectra of a range of reactant mixtures .....                                                                                                                                  | 5  |
| <b>Figure ES4.</b> EPR spectrum of <b>1</b> (1 mol%) and Sc(OTf) <sub>3</sub> (0.5 mol%) with styrene and hydrogen peroxide in acetonitrile solution after 3 minutes measured at 100 K.....              | 5  |
| <b>Figure ES5.</b> Chromatograms of styrene oxidation in acetone (left) and in MeCN (right) after 3 minutes without work-up.....                                                                         | 6  |
| <b>General experimental details</b> .....                                                                                                                                                                | 6  |
| <b>General epoxidation procedure</b> .....                                                                                                                                                               | 6  |
| <b>Table ES1.</b> <sup>1</sup> H NMR data for epoxides prepared in this study .....                                                                                                                      | 7  |
| NMR data for [1-(2-phenylcyclopropyl)ethenyl]benzene <sup>7</sup> .....                                                                                                                                  | 8  |
| NMR data for 2-phenyl-2-(2-phenylcyclopropyl)oxirane (2 diastereomers) <sup>8</sup> .....                                                                                                                | 8  |
| NMR data for 2,5-diphenyl-3,6-dihydro-2H-pyran .....                                                                                                                                                     | 8  |
| <b>Spectra of epoxides</b> .....                                                                                                                                                                         | 9  |
| <sup>1</sup> H NMR spectrum of polymerised 4-methoxystyrene <sup>9</sup> .....                                                                                                                           | 16 |
| <sup>1</sup> H NMR spectrum of [1-(2-phenylcyclopropyl)ethenyl]benzene <sup>7</sup> .....                                                                                                                | 17 |
| <sup>13</sup> C NMR spectrum of [1-(2-phenylcyclopropyl)ethenyl]benzene <sup>7</sup> .....                                                                                                               | 17 |
| <sup>1</sup> H NMR spectrum of 2-phenyl-2-(2-phenylcyclopropyl)oxirane (2 diastereomers) <sup>8</sup> .....                                                                                              | 18 |
| <sup>13</sup> C NMR spectrum of 2-phenyl-2-(2-phenylcyclopropyl)oxirane (2 diastereomers) <sup>8</sup> .....                                                                                             | 18 |
| <sup>1</sup> H NMR spectrum of 2,5-diphenyl-3,6-dihydro-2H-pyran.....                                                                                                                                    | 19 |
| <b>Figure ES6.</b> Chromatograms of reaction mixtures of the oxidation of 4-acetoxystyrene, 4-cyanostyrene, 4-nitrostyrene and 3-nitrostyrene. ....                                                      | 21 |
| <b>Figure ES7.</b> Chromatograms of reaction mixtures of the oxidation of 4-fluorostyrene, 4-chlorostyrene and 4-bromostyrene.....                                                                       | 22 |
| <b>Figure ES8.</b> Chromatogram of the reaction mixture of <i>cis</i> -stilbene oxidation. ....                                                                                                          | 22 |
| <b>Figure ES9.</b> Chromatograms of reaction mixtures of the oxidation of 4-methylstyrene, 2,4,6-trimethylstyrene, β- <i>cis</i> -methylstyrene, β- <i>trans</i> -methylstyrene and α-methylstyrene..... | 23 |
| <b>Calibrations</b> .....                                                                                                                                                                                | 24 |
| <b>References</b> .....                                                                                                                                                                                  | 24 |

The  $^1\text{H}$  NMR spectra of the oxidation of 4-fluorostyrene under identical conditions used to optimise reaction conditions for styrene epoxidation are presented. This is because over-oxidation products were not separable by HPLC for the styrene oxidation and consequently could not be identified satisfactorily; in the case of 4-fluorostyrene clear separation occurred. As can clearly be seen in the presence of 0.5 mol% co-catalyst the reaction conversion and styrene selectivity was very high. In comparison, when 10 mol%  $\text{Sc}(\text{OTf})_3$  was employed, significant amounts of starting material (SM) remain as well as products resulting from over-oxidation, keto alcohol (KA) and epoxide ring-opening (D) and the reaction was also significantly slower. Moreover, the pure epoxide is not completely stable under these conditions, and a stability test of pure 4-fluorostyrene oxide showed that after 3 minutes 87% of the epoxide remained unreacted. The  $^1\text{H}$  NMR spectrum of the styrene reaction was similarly complex for 10 mol% of the Lewis acid additive and essentially a single epoxide product when 0.5 mol% was employed.

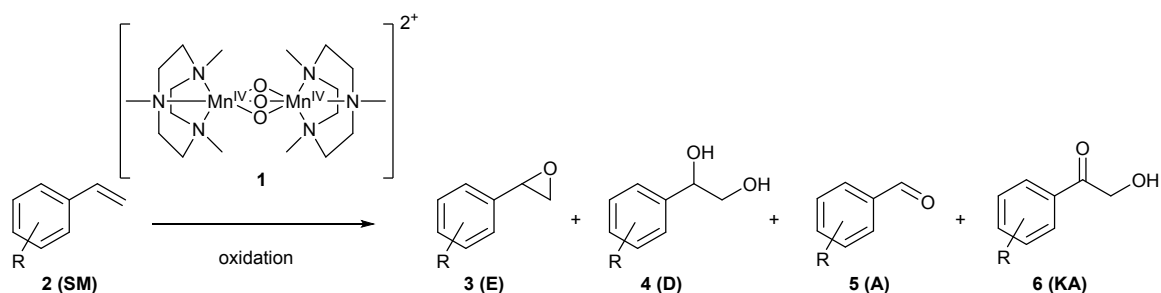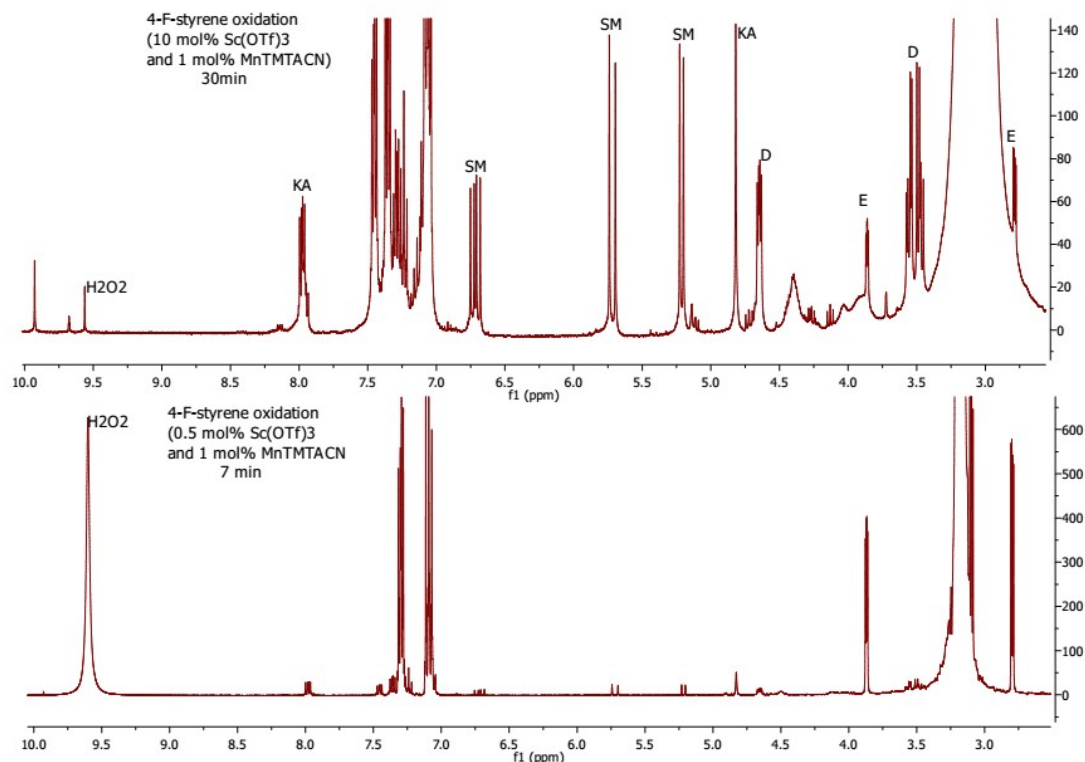

**Figure ES1.** The  $^1\text{H}$  NMR spectra of the catalytic oxidation of 4-fluorostyrene performed in  $\text{MeCN-d}_3$ .

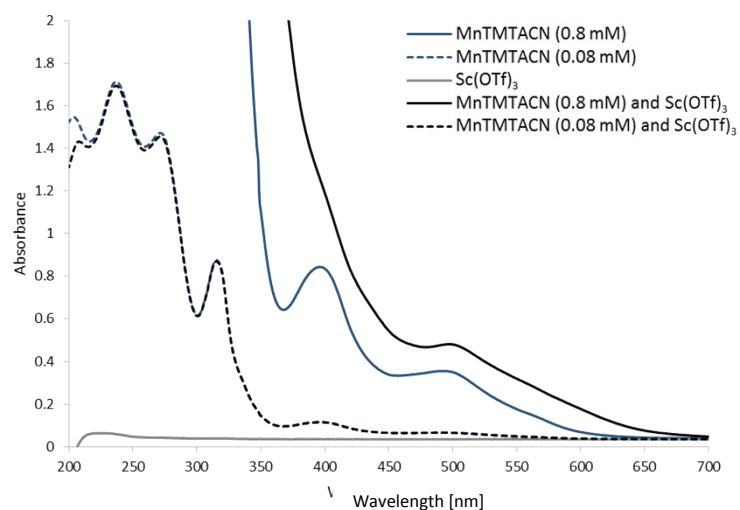

**Figure ES2.** The UV-VIS spectra of **1** and the mixtures with  $\text{Sc}(\text{OTf})_3$  in MeCN at different concentrations.

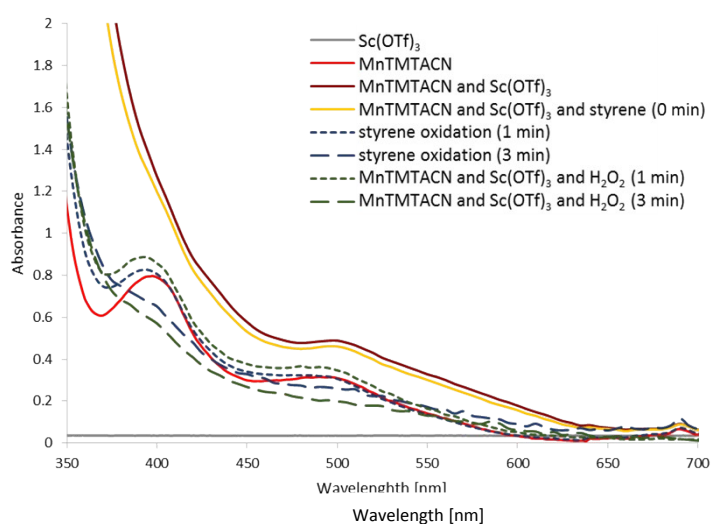

**Figure ES3.** UV-VIS spectra of a range of reactant mixtures

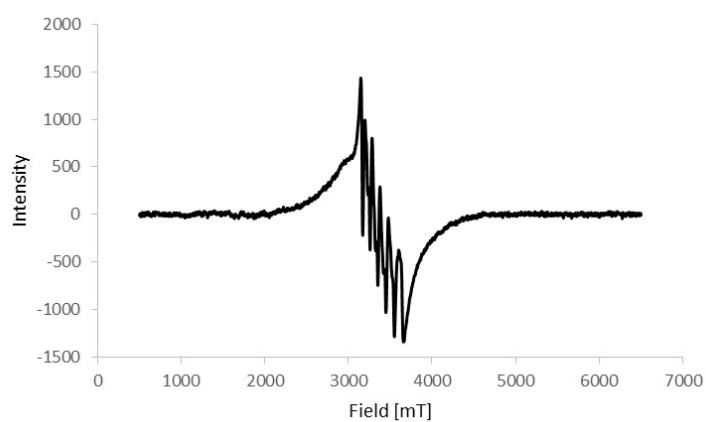

**Figure ES4.** EPR spectrum of **1** (1 mol%) and  $\text{Sc}(\text{OTf})_3$  (0.5 mol%) with styrene and hydrogen peroxide in acetonitrile solution after 3 minutes measured at 100 K

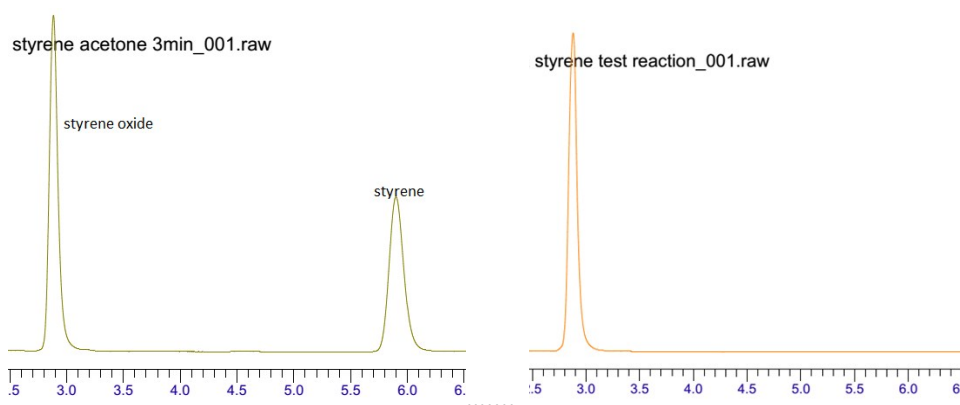

**Figure E55.** Chromatograms of styrene oxidation in acetone (left) and in MeCN (right) after 3 minutes without work-up.

### General experimental details

All reagents were purchased from Sigma-Aldrich, Acros Organics, or Alfa Aesar and were used without further purification unless otherwise stated. The hydrogen peroxide used in the epoxidation procedures was bought from Sigma Aldrich as a 30% (w/w) solution in water with stabilizer. Acetonitrile was refluxed over  $\text{CaH}_2$  and freshly distilled under a nitrogen atmosphere prior to use.<sup>‡</sup>  $^1\text{H}$  NMR and  $^{13}\text{C}$  NMR spectra were recorded on either a Bruker AV400 or a Bruker AMX400 at 400 MHz and at 100.2 MHz respectively and referenced to the signal of tetramethylsilane (TMS) or residual protonated solvent. UV-Vis spectra were obtained on an HP 8453 spectrophotometer, absorption maxima ( $\lambda_{\text{max}}$ ) are expressed in nm, the molar extinction coefficients ( $\epsilon$ ) are expressed in  $\text{L mol}^{-1}\text{cm}^{-1}$ . EPR experiments were carried out using an X-band Bruker Elexsys E500 Spectrometer (Bruker BioSpin GmbH, Germany) equipped with a closed-cycle cryostat (Cryogenic Ltd, UK). The magnetic field was calibrated at room temperature with a Bruker strong pitch sample ( $g = 2.0028$ ). Measurements were carried out in an X-band split-ring resonator module with 2 mm sample access (ER 4118X-MS2). All measurements were recorded at 100 K with a 7 G modulation amplitude and 2 mW microwave power. The reaction solution was flash-frozen in liquid nitrogen prior to use. Electrospray ionisation mass spectrometry was obtained from the EPSRC National Mass Spectrometry Service, University of Wales, Swansea on a Thermofisher LTQ Orbitrap XL. High Performance Liquid Chromatography was performed on a Perkin Elmer Series 200 instrument equipped with UV-Vis detector using an reverse phase ZORBAX Eclipse Plus C18 (4.6×150 mm, 5  $\mu\text{m}$ ) column.

### General epoxidation procedure

A solution containing scandium(III) triflate (0.005 M, 500  $\mu\text{L}$ ) in dry  $\text{MeCN}^\ddagger$  was delivered to a capped microwave reaction vial with closed-top seal and silicone septum followed by a solution of catalyst **1** (0.01 M, 500  $\mu\text{L}$ ) in dry MeCN and the mixture was stirred for 5 min. Then a solution of the styrene (0.50 M, 1000  $\mu\text{L}$ , 1.0 equiv.) in dry MeCN were added to the reaction vial and the mixture allowed to equilibrate for 10 min at room temperature. In the meantime, a solution of  $\text{H}_2\text{O}_2$  (30% aq. w/w 855  $\mu\text{L}$ , 10 equiv.) in MeCN (3000  $\mu\text{L}$ ) was prepared and after 5 min it was added to the reaction mixture in one portion. After 3 min the addition of the hydrogen peroxide a small amount of silver powder was added to an aliquot and after approximately 2 minutes biphenyl (internal standard, 0.10 M, 500  $\mu\text{L}$ ) in dry MeCN was added and a sample (200  $\mu\text{L}$ ) was taken and filtered through a short pad of silica and  $\text{MgSO}_4$  using MeCN (3 mL) as eluent. The aliquot was then analysed by HPLC.

<sup>‡</sup>It is essential to use freshly distilled dry acetonitrile; HPLC grade acetonitrile should not be used.

**Table ES1.** <sup>1</sup>H NMR data for epoxides prepared in this study

| Substituted styrene oxide, R =           | Ref                                                  | Retention time [min] <sup>a</sup>         | <sup>1</sup> H NMR (400 MHz, CDCl <sub>3</sub> )                                                                                                                                         |
|------------------------------------------|------------------------------------------------------|-------------------------------------------|------------------------------------------------------------------------------------------------------------------------------------------------------------------------------------------|
| H                                        | <sup>1</sup>                                         | 2.84                                      | δ 7.29 – 7.11 (m, 5H), 3.74 (dd, <i>J</i> = 4.0, 2.6 Hz, 1H), 3.02 (dd, <i>J</i> = 5.5, 4.1 Hz, 1H), 2.68 (dd, <i>J</i> = 5.5, 2.6 Hz, 1H).                                              |
| α-Me                                     | <sup>1</sup>                                         | 3.39                                      | δ 7.34 – 7.12 (m, 5H), 2.91 (d, <i>J</i> = 5.4 Hz, 1H), 2.73 (d, <i>J</i> = 5.4 Hz, 1H), 1.65 (s, 3H).                                                                                   |
| β- <i>trans</i> -Me                      | <sup>1</sup>                                         | 3.41                                      | δ 7.43 – 7.24 (m, 5H), 3.60 (d, <i>J</i> = 2.0 Hz, 1H), 3.07 (qd, <i>J</i> = 5.1, 2.1 Hz, 1H), 1.48 (d, <i>J</i> = 5.2 Hz, 3H).                                                          |
| β- <i>cis</i> -Me                        | <sup>2</sup>                                         | 5.81 <sup>b</sup>                         | δ 7.34 – 7.08 (m, 5H), 3.99 (d, <i>J</i> = 4.2 Hz, 1H), 3.36 – 3.12 (m, 1H), 1.01 (d, <i>J</i> = 5.4 Hz, 3H).                                                                            |
| <i>cis</i> -stilbene (β- <i>cis</i> -Ph) | <i>cis</i> <sup>3</sup><br><i>trans</i> <sup>1</sup> | <i>cis</i> : 6.36,<br><i>trans</i> : 9.76 | <i>cis</i> -stilbene oxide δ 7.24 – 7.11 (m, 10H), 4.37 (s, 2H); <i>trans</i> -stilbene oxide δ 7.44 – 7.30 (m, 10H), 3.88 (s, 2H).                                                      |
| 4-F                                      | <sup>1</sup>                                         | 2.89                                      | δ 7.32 – 7.22 (m, 2H), 7.10 – 6.97 (m, 2H), 3.85 (dd, <i>J</i> = 3.9, 2.7 Hz, 1H), 3.14 (dd, <i>J</i> = 5.4, 4.1 Hz, 1H), 2.77 (dd, <i>J</i> = 5.4, 2.6 Hz, 1H).                         |
| 4-Cl                                     | <sup>1</sup>                                         | 3.93                                      | δ 7.25 – 7.14 (m, 2H), 7.14 – 7.04 (m, 2H), 3.72 (dd, <i>J</i> = 4.0, 2.6 Hz, 1H), 3.03 (dd, <i>J</i> = 5.5, 4.1 Hz, 1H), 2.64 (dd, <i>J</i> = 5.5, 2.5 Hz, 1H).                         |
| 4-Br                                     | <sup>1</sup>                                         | 4.35                                      | δ 7.48 – 7.44 (m, 2H), 7.17 – 7.12 (m, 2H), 3.82 (dd, <i>J</i> = 3.9, 2.6 Hz, 1H), 3.14 (dd, <i>J</i> = 5.4, 4.1 Hz, 1H), 2.75 (dd, <i>J</i> = 5.5, 2.5 Hz, 1H).                         |
| 4-NO <sub>2</sub>                        | <sup>4</sup>                                         | 2.61                                      | δ 8.29 – 8.19 (m, 2H), 7.50 – 7.40 (m, 2H), 3.99 (dd, <i>J</i> = 4.0, 2.5 Hz, 1H), 3.25 (dd, <i>J</i> = 5.5, 4.1 Hz, 1H), 2.80 (dd, <i>J</i> = 5.5, 2.5 Hz, 1H)                          |
| 4-AcO                                    | <sup>5</sup>                                         | 2.26                                      | δ 7.31 – 7.26 (m, 2H), 7.10 – 7.04 (m, 2H), 3.86 (dd, <i>J</i> = 3.9, 2.7 Hz, 1H), 3.13 (dd, <i>J</i> = 5.4, 4.1 Hz, 1H), 2.77 (dd, <i>J</i> = 5.5, 2.6 Hz, 1H), 2.29 (s, 3H).           |
| 4-CN                                     | <sup>5</sup>                                         | 2.16                                      | δ 7.64 (d, <i>J</i> = 8.3 Hz, 2H), 7.39 (d, <i>J</i> = 8.3 Hz, 2H), 3.90 (dd, <i>J</i> = 4.0, 2.5 Hz, 1H), 3.20 (dd, <i>J</i> = 5.5, 4.1 Hz, 1H), 2.75 (dd, <i>J</i> = 5.5, 2.5 Hz, 1H). |
| 3-NO <sub>2</sub>                        | <sup>4</sup>                                         | 2.60                                      | δ 8.18 – 8.09 (m, 2H), 7.66 – 7.46 (m, 2H), 3.97 (dd, <i>J</i> = 4.0, 2.5 Hz, 1H), 3.22 (dd, <i>J</i> = 5.4, 4.1 Hz, 1H), 2.81 (dd, <i>J</i> = 5.4, 2.5 Hz, 1H).                         |
| 4-Me                                     | <sup>1</sup>                                         | 3.72                                      | δ 7.21 – 7.09 (m, 4H), 3.88 – 3.77 (m, 1H), 3.13 (dd, <i>J</i> = 5.4, 4.1 Hz, 1H), 2.84 – 2.76 (m, 1H), 2.35 (s, 3H).                                                                    |
| 2,4,6-triMe                              | <sup>6</sup>                                         | 7.39                                      | δ 6.83 (s, 2H), 3.91 (t, <i>J</i> = 3.3 Hz, 1H), 3.17 (ddd, <i>J</i> = 5.5, 4.1, 0.5 Hz, 1H), 2.75 (ddd, <i>J</i> = 5.6, 2.9, 0.5 Hz, 1H), 2.38 (s, 6H), 2.28 (s, 3H).                   |

<sup>a</sup> analysis condition: ZORBAX Eclipse Plus C18 (4.6 × 150 mm, 5 μm) column, eluent program: 30% H<sub>2</sub>O/70% MeOH eluent; flow 1mL/min, λ=212 nm; <sup>b</sup> eluent program: 7 min - 40% H<sub>2</sub>O/60% MeOH, then 30% H<sub>2</sub>O/70% MeOH

NMR data for [1-(2-phenylcyclopropyl)ethenyl]benzene<sup>7</sup>

<sup>1</sup>H NMR (400 MHz, CDCl<sub>3</sub>) δ 7.46 – 7.42 (m, 2H), 7.27 – 7.05 (m, 8H), 5.29 (s, 1H), 4.97 (s, 1H), 1.97 – 1.85 (m, 2H), 1.33 (ddd, *J* = 8.6, 6.1, 5.1 Hz, 1H), 1.20 (dt, *J* = 8.5, 5.4 Hz, 1H); <sup>13</sup>C NMR (100.2 MHz, CDCl<sub>3</sub>) δ 148.5, 142.7, 141.2, 128.6, 128.4, 127.7, 126.3, 125.9, 109.5, 28.0, 26.6, 16.0.

NMR data for 2-phenyl-2-(2-phenylcyclopropyl)oxirane (2 diastereomers)<sup>8</sup>

<sup>1</sup>H NMR (400 MHz, CDCl<sub>3</sub>) δ 7.51 – 7.04 (m, 10H), 3.01 (d, *J* = 5.5 Hz, 1H), 2.90 (d, *J* = 5.5 Hz, 0.6H *diastereomer 1*), 2.84 (d, *J* = 5.3 Hz, 0.4H *diastereomer 2*), 2.08 – 1.96 (m, 1H), 1.90 (s, 1H), 1.11 (s, 1.4H *diastereomer 2*), 1.00 – 0.92 (m, 0.6H *diastereomer 1*); <sup>13</sup>C NMR (100.2 MHz, CDCl<sub>3</sub>, 2 diastereomers) δ 142.3, 142.1, 140.4, 140.2, 128.6, 128.5, 128.4, 127.8, 126.2, 126.1, 126.1, 126.0, 125.8, 59.1, 58.5, 55.1, 54.8, 25.9, 25.7, 21.0, 20.3, 12.9, 11.4; GC-MS (EI) *m/z* 236 (M<sup>+</sup>), 129 (100%), 115, 91, 71, 44, 128, 207.

NMR data for 2,5-diphenyl-3,6-dihydro-2H-pyran

<sup>1</sup>H NMR (400 MHz, CDCl<sub>3</sub>) δ 7.50 – 7.44 (m, 2H), 7.43 – 7.26 (m, 8H), 5.94 (t, *J* = 8.6 Hz, 1H), 4.82 (dt, *J* = 9.2, 4.6 Hz, 1H), 4.53 (d, *J* = 12.0 Hz, 1H), 4.38 (d, *J* = 11.9 Hz, 1H), 2.78 (dt, *J* = 14.2, 8.5 Hz, 1H), 2.72 – 2.62 (m, 1H), <sup>13</sup>C NMR (100.2 MHz, CDCl<sub>3</sub>) δ 144.2, 142.8, 141.7, 128.6, 128.5, 127.82, 127.80, 127.3, 126.2, 125.8, 73.0, 59.8, 38.6.

## Spectra of epoxides

### Styrene oxide<sup>1</sup>

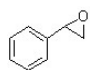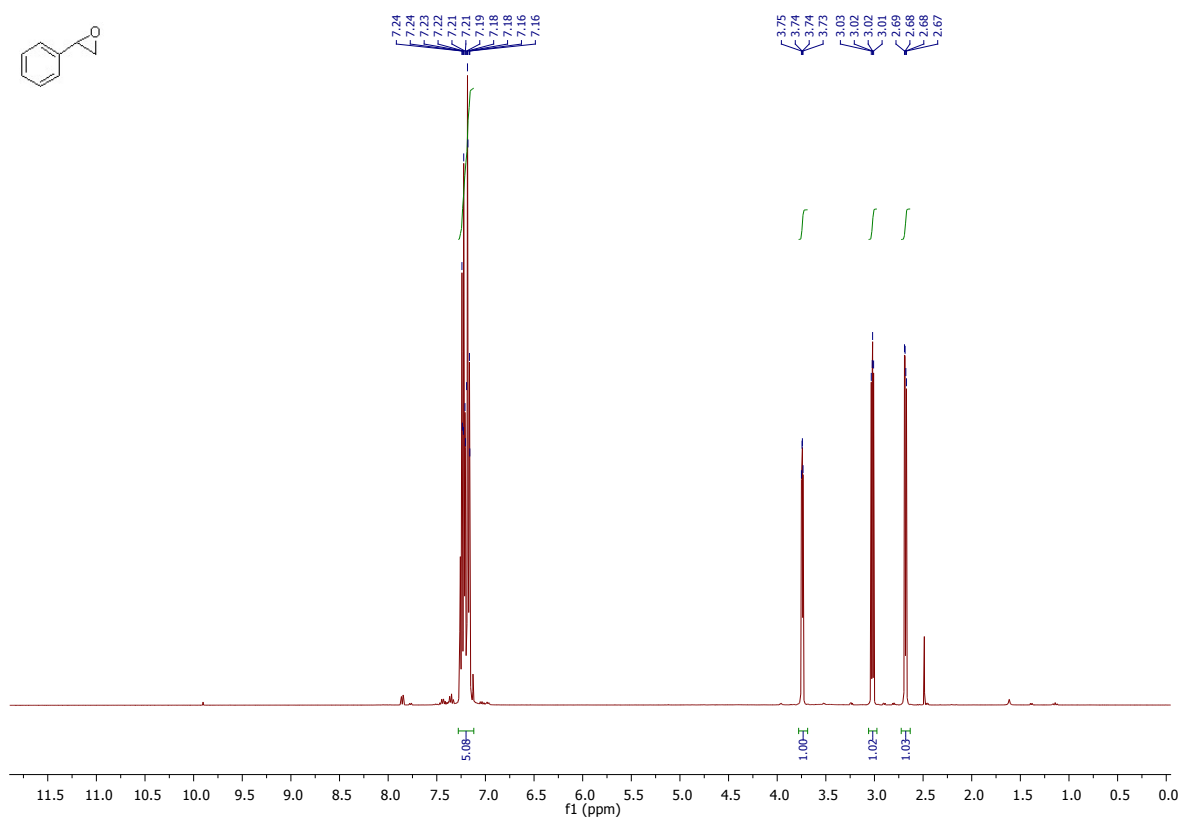

### $\alpha$ -Methylstyrene oxide<sup>1</sup>

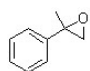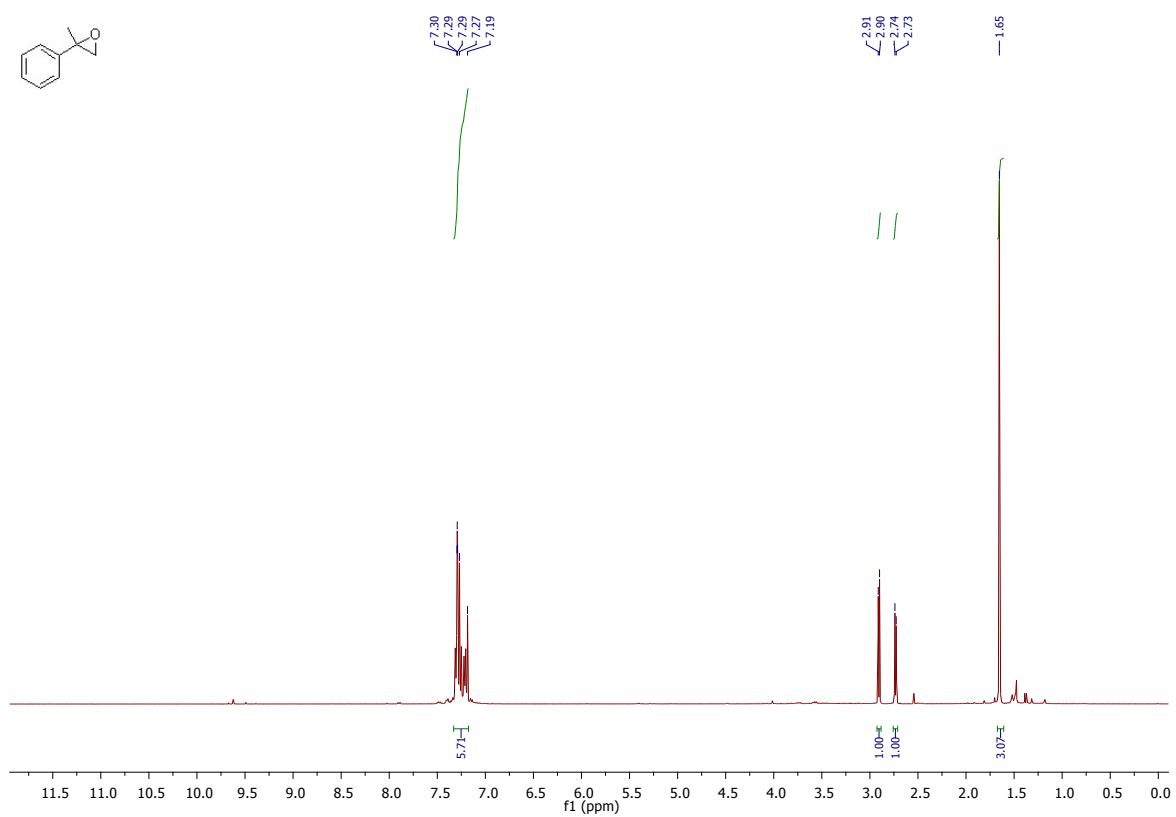



$\beta$ -*trans*-Methylstyrene oxide<sup>1</sup>

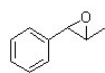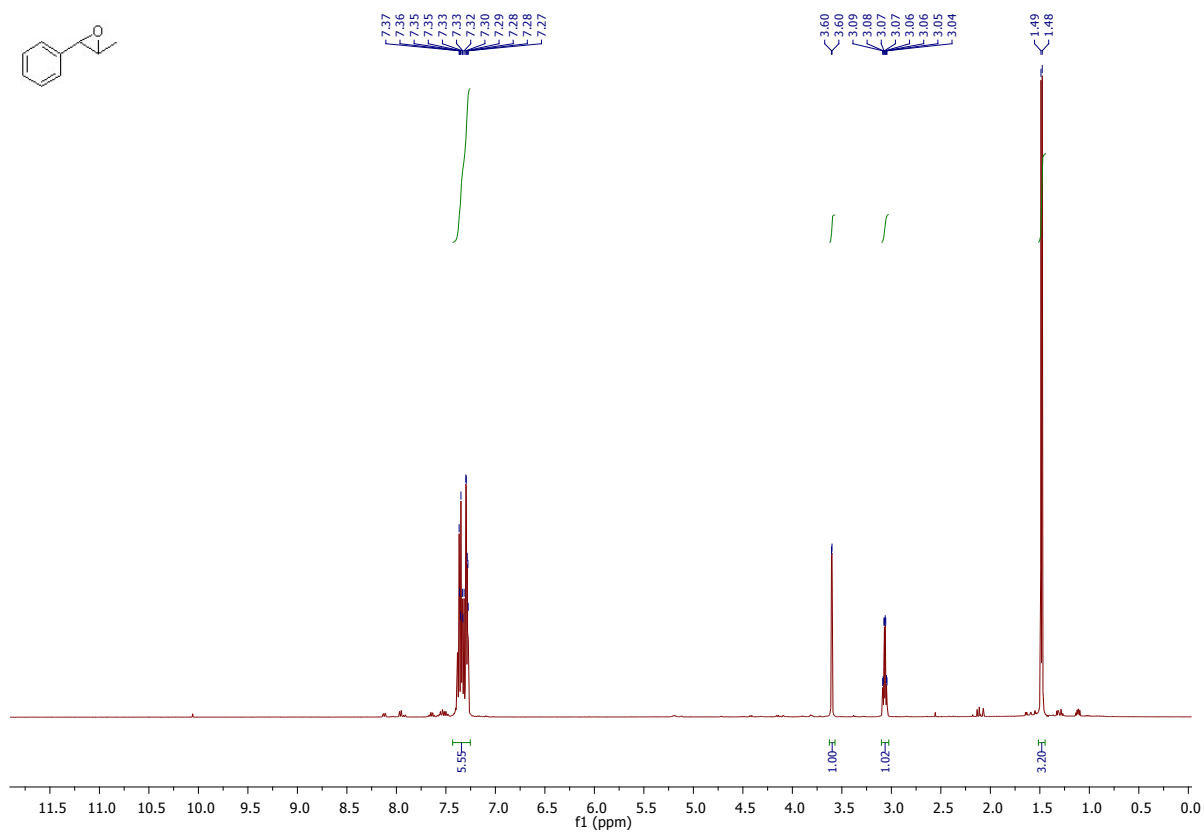

$\beta$ -*cis*-Methylstyrene oxide<sup>2</sup>

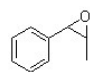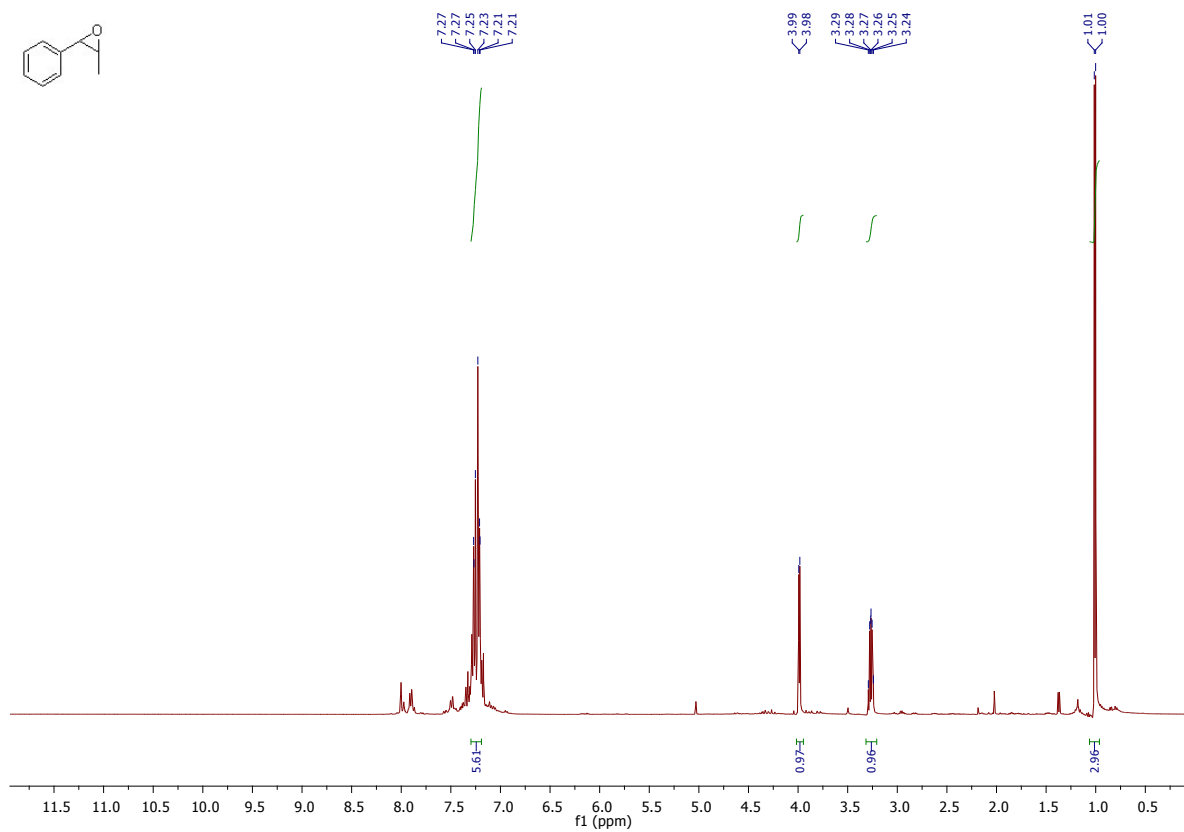

*cis*-Stilbene oxide<sup>3</sup>

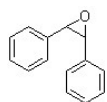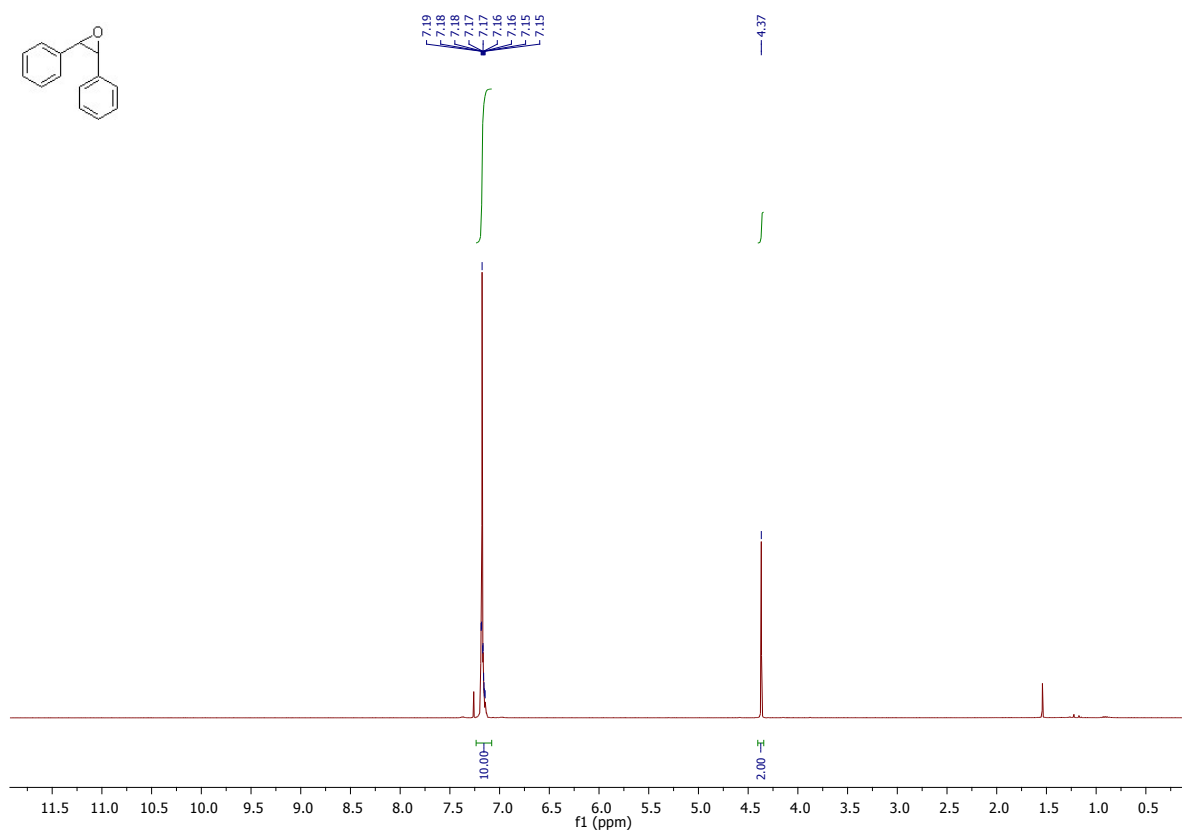

*trans*-Stilbene oxide<sup>1</sup>

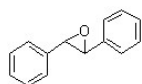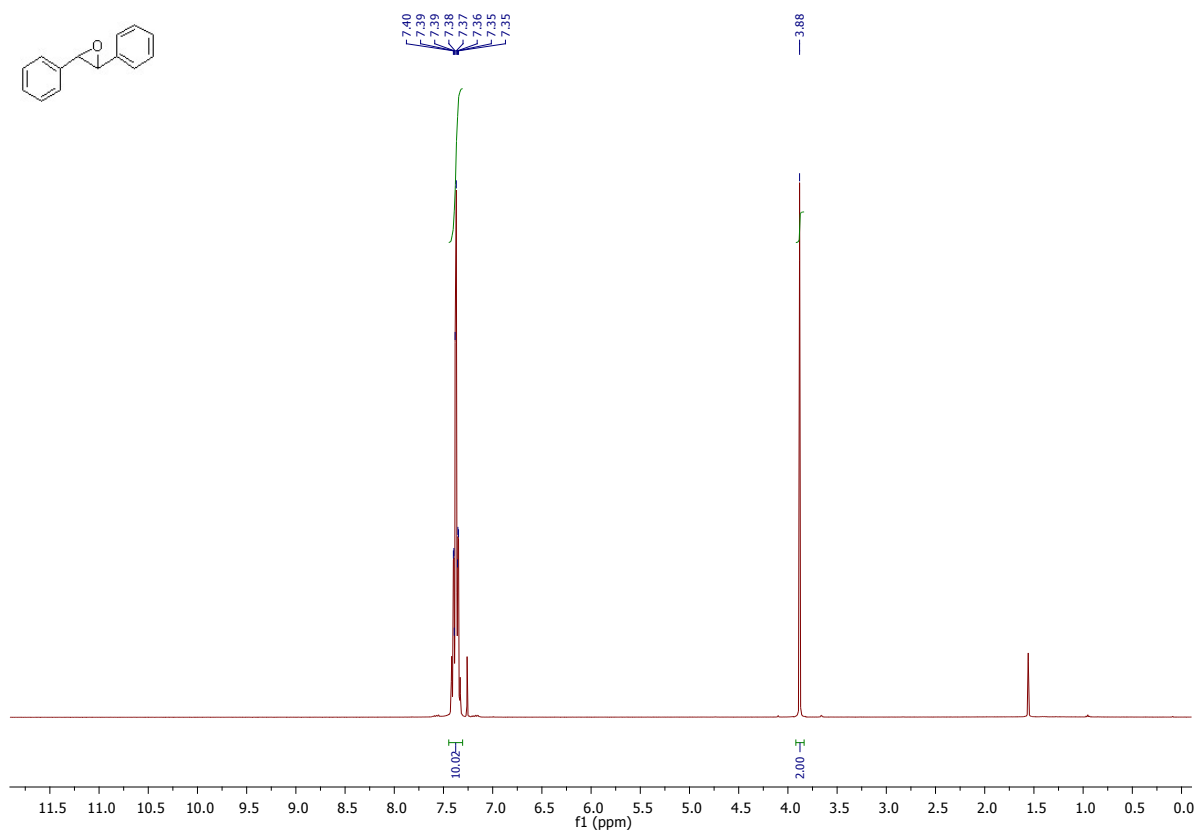

### 4-Fluorostyrene oxide<sup>1</sup>

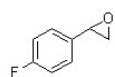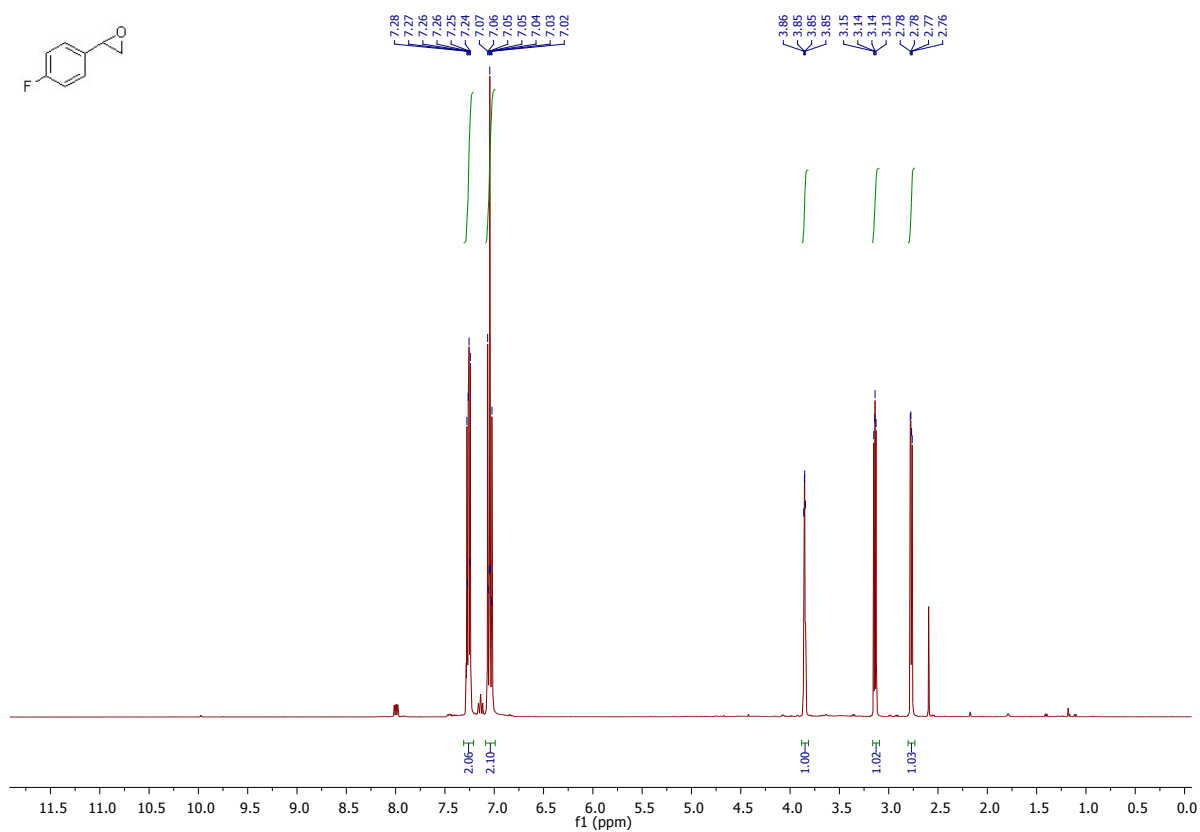

### 4-Chlorostyrene oxide<sup>1</sup>

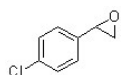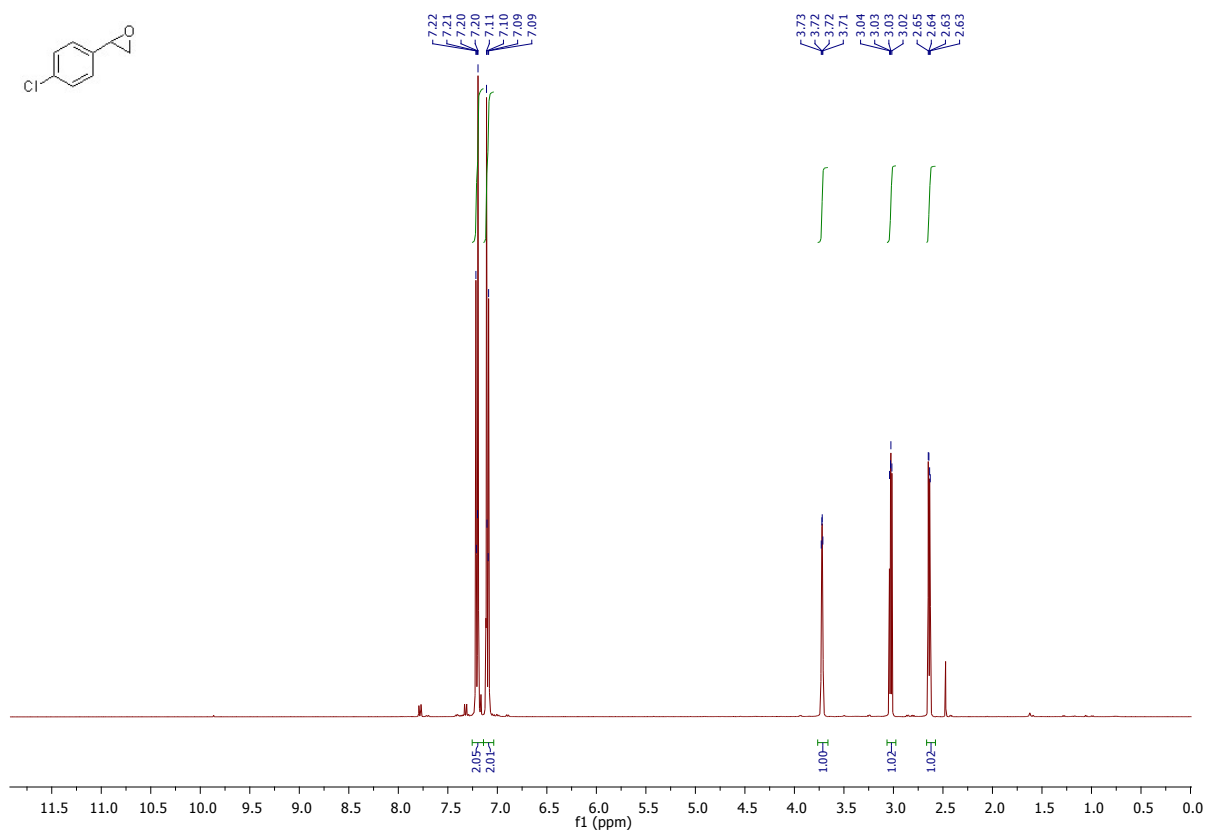

### 4-Bromostyrene oxide<sup>1</sup>

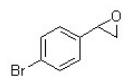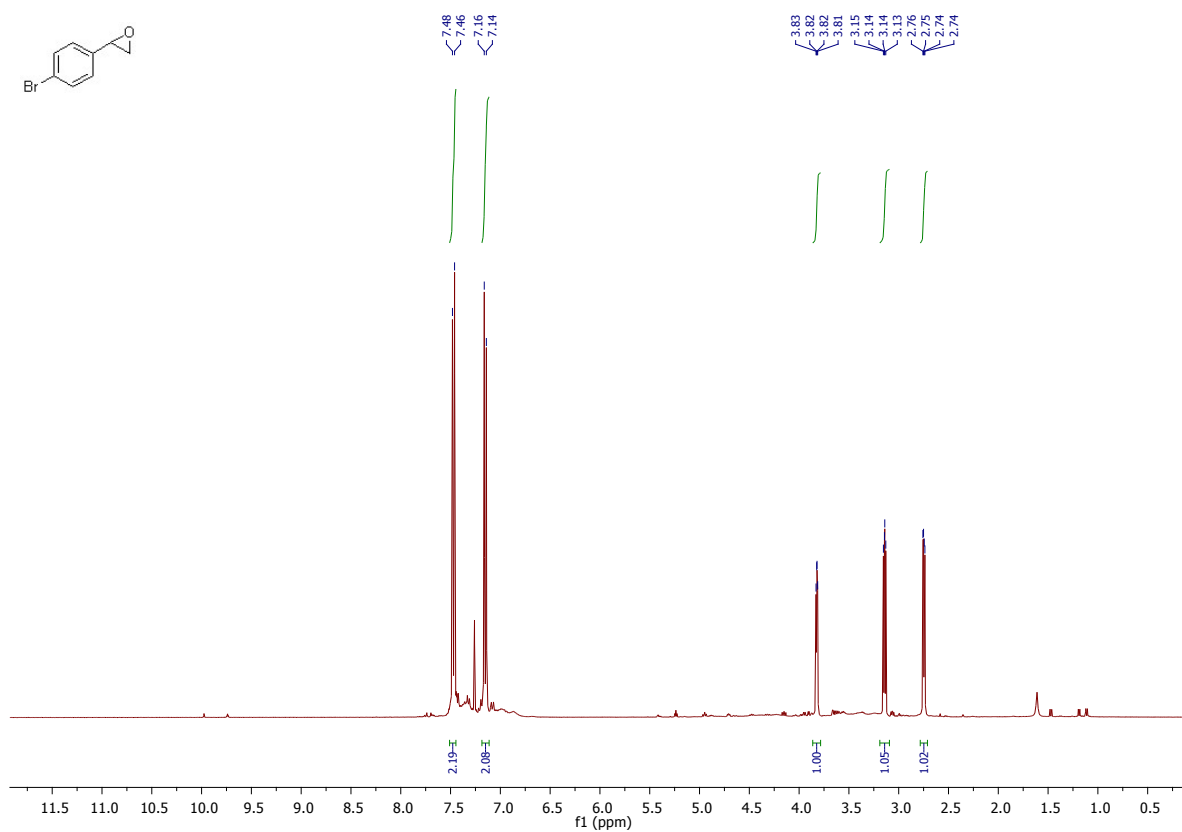

### 4-Nitrostyrene oxide<sup>4</sup>

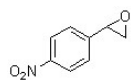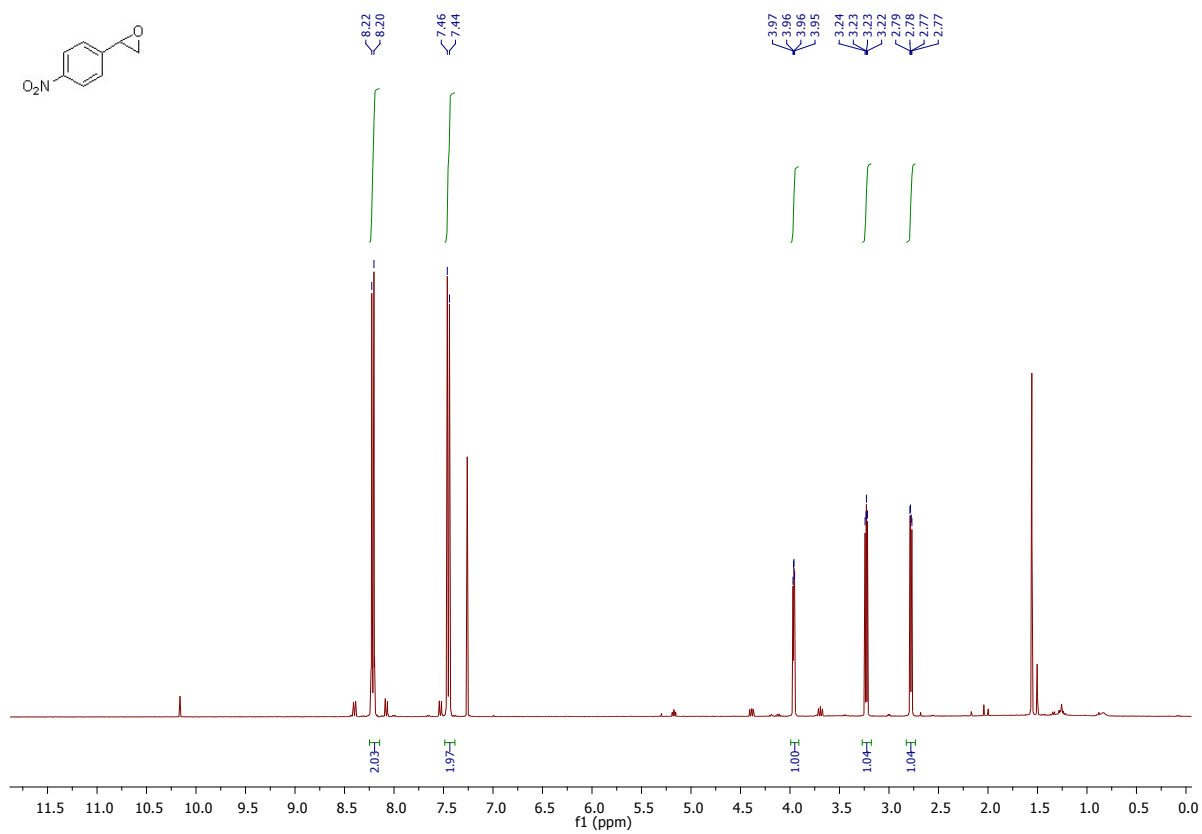

### 4-Acetoxyethylene oxide<sup>5</sup>

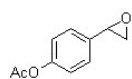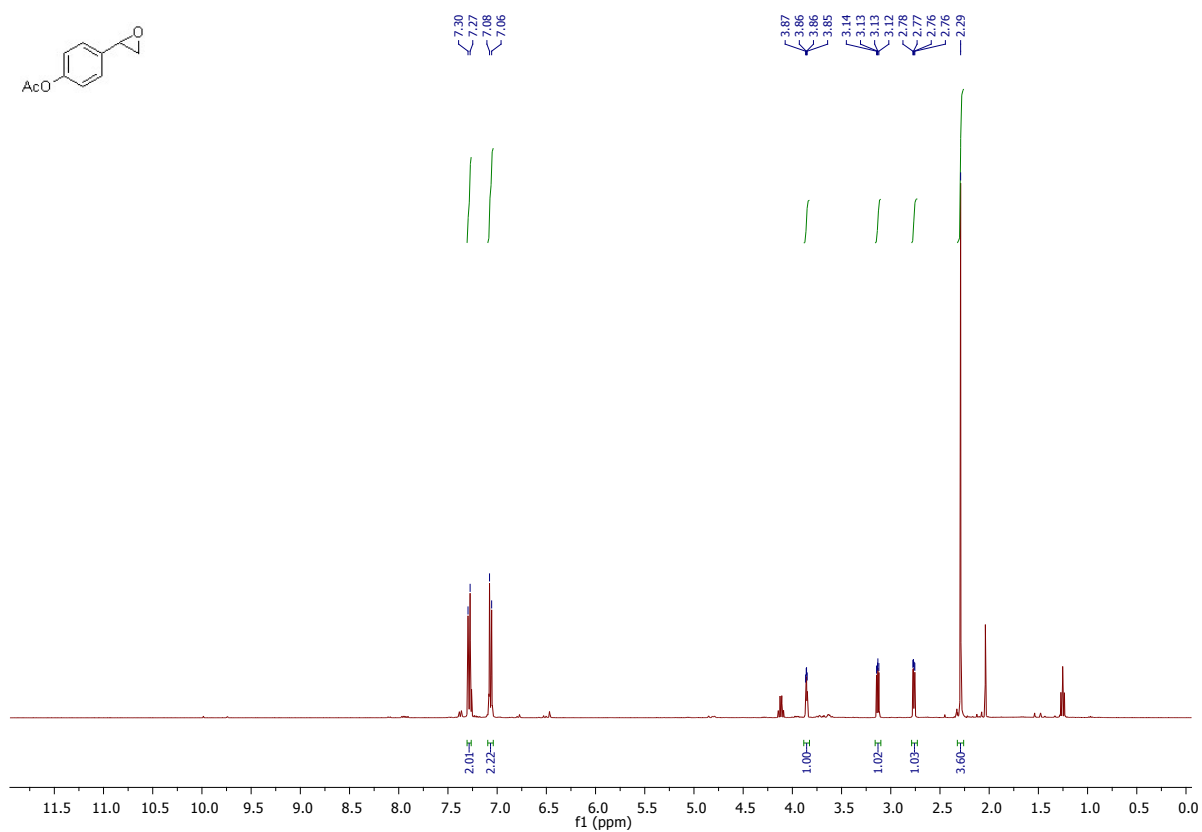

### 4-Cyanoethylene oxide<sup>5</sup>

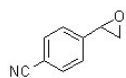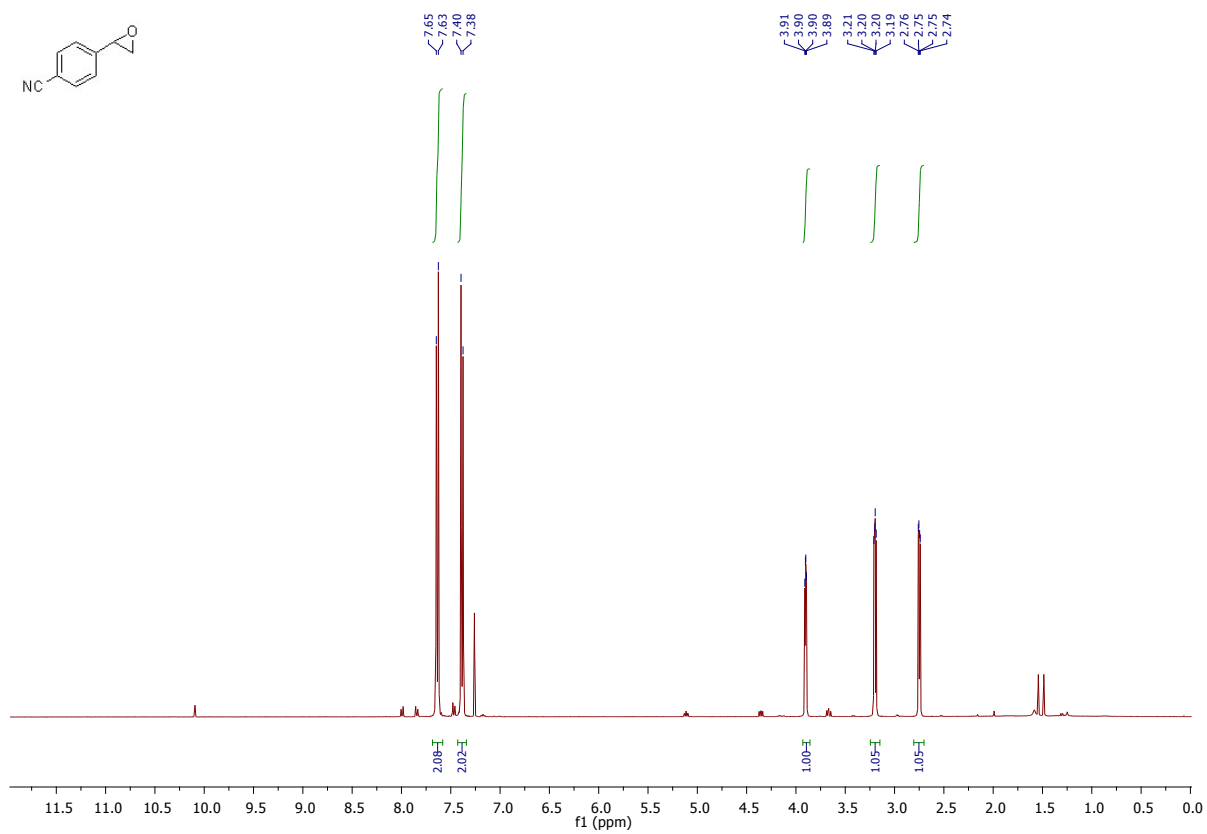

### 3-Nitrostyrene oxide<sup>4</sup>

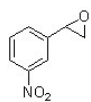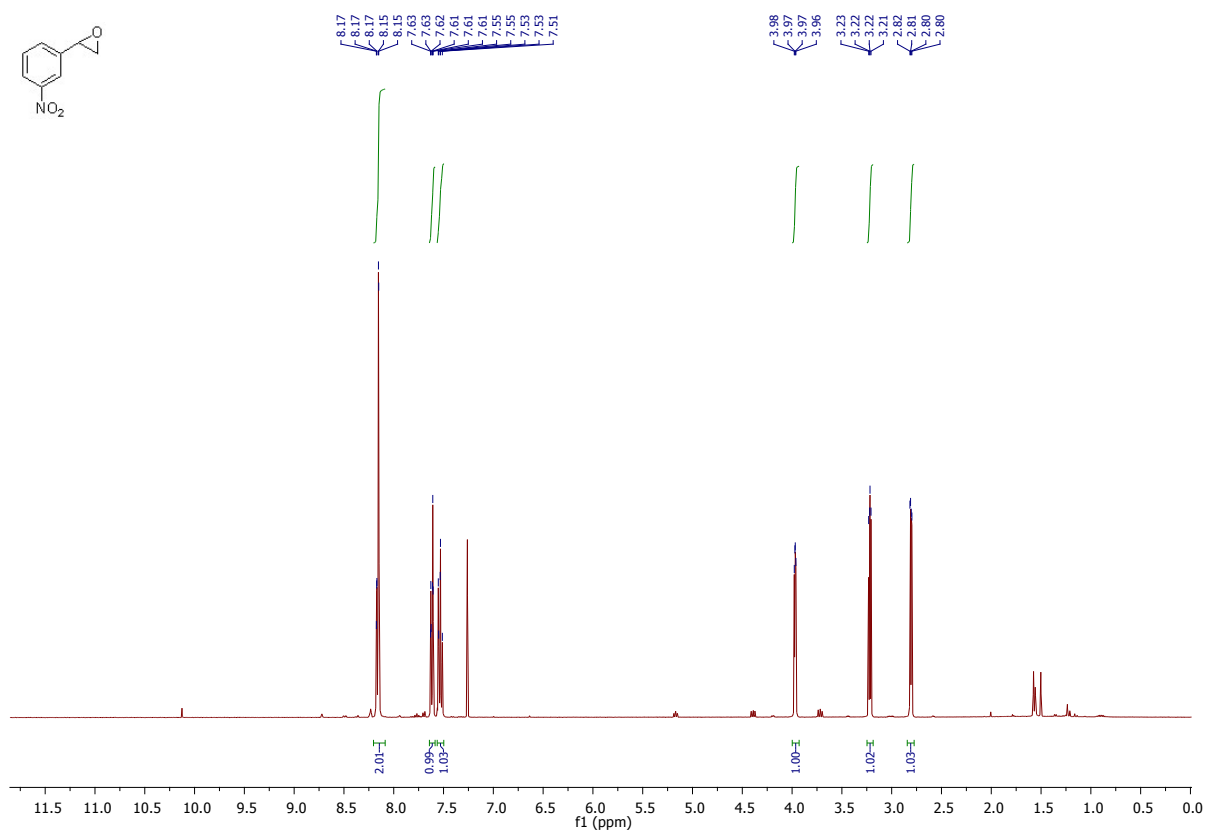

### 4-Methylstyrene oxide<sup>1</sup>

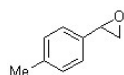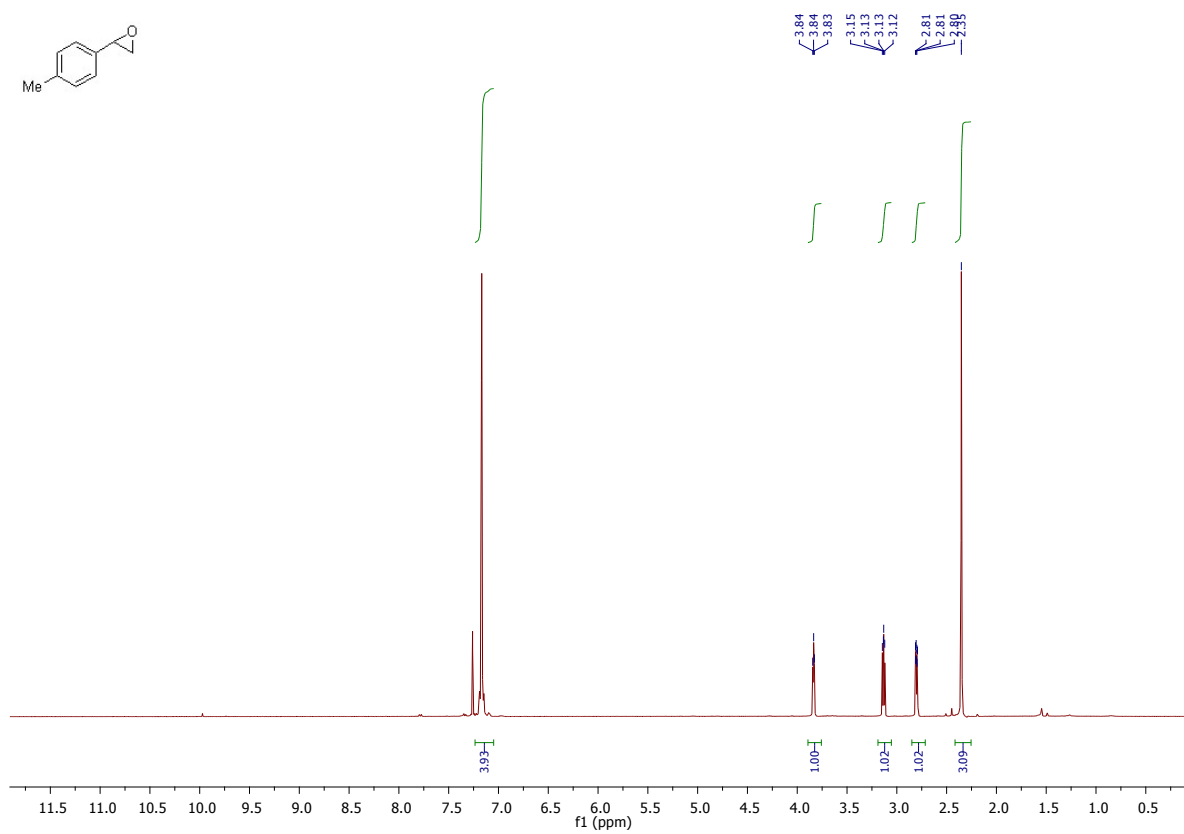

### 2,4,6-Trimethylstyrene oxide<sup>6</sup>

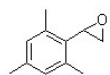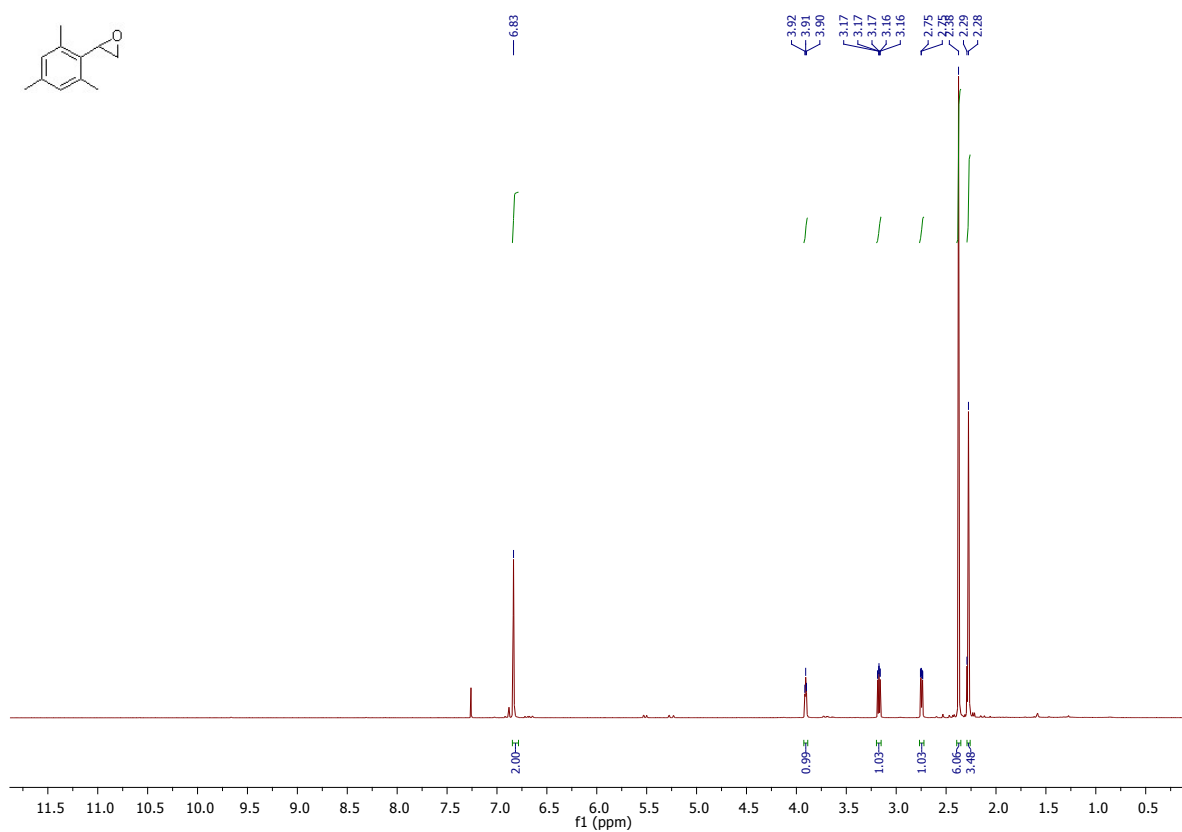

### <sup>1</sup>H NMR spectrum of polymerised 4-methoxystyrene<sup>9</sup>

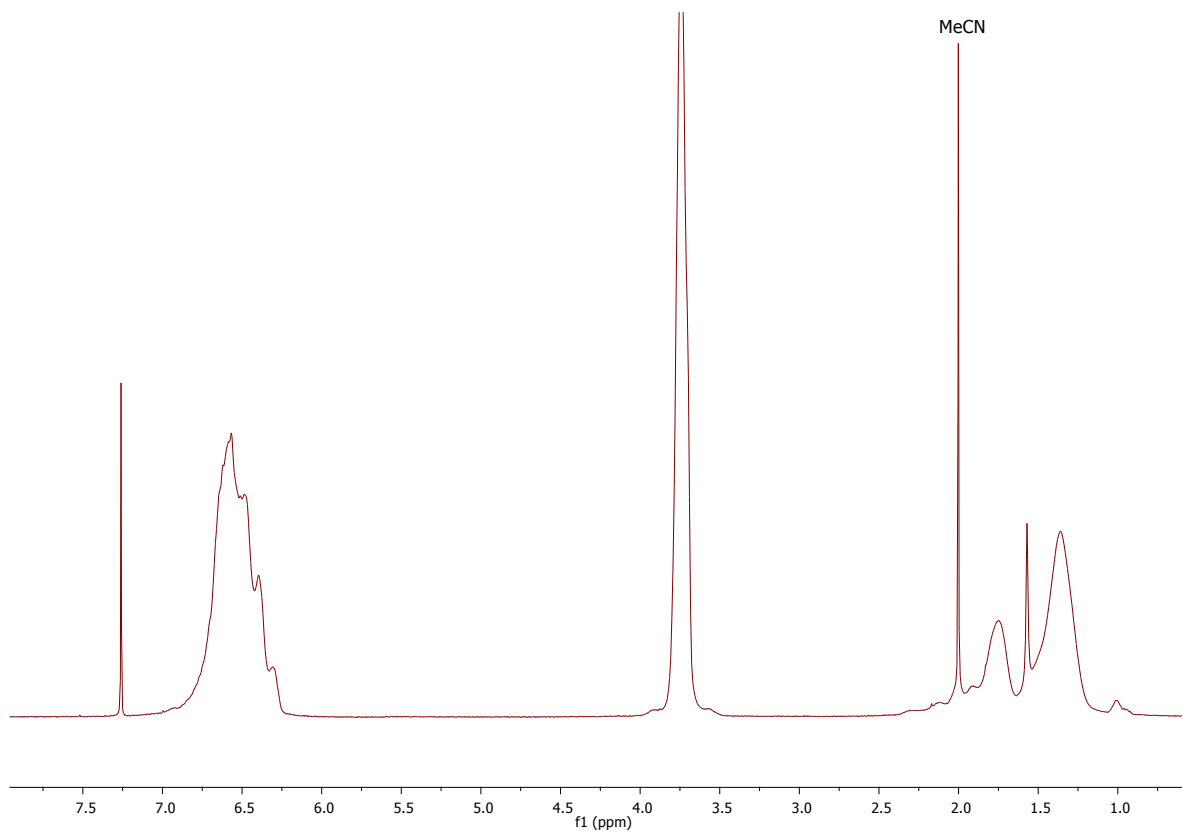

### <sup>1</sup>H NMR spectrum of [1-(2-phenylcyclopropyl)ethenyl]benzene<sup>7</sup>

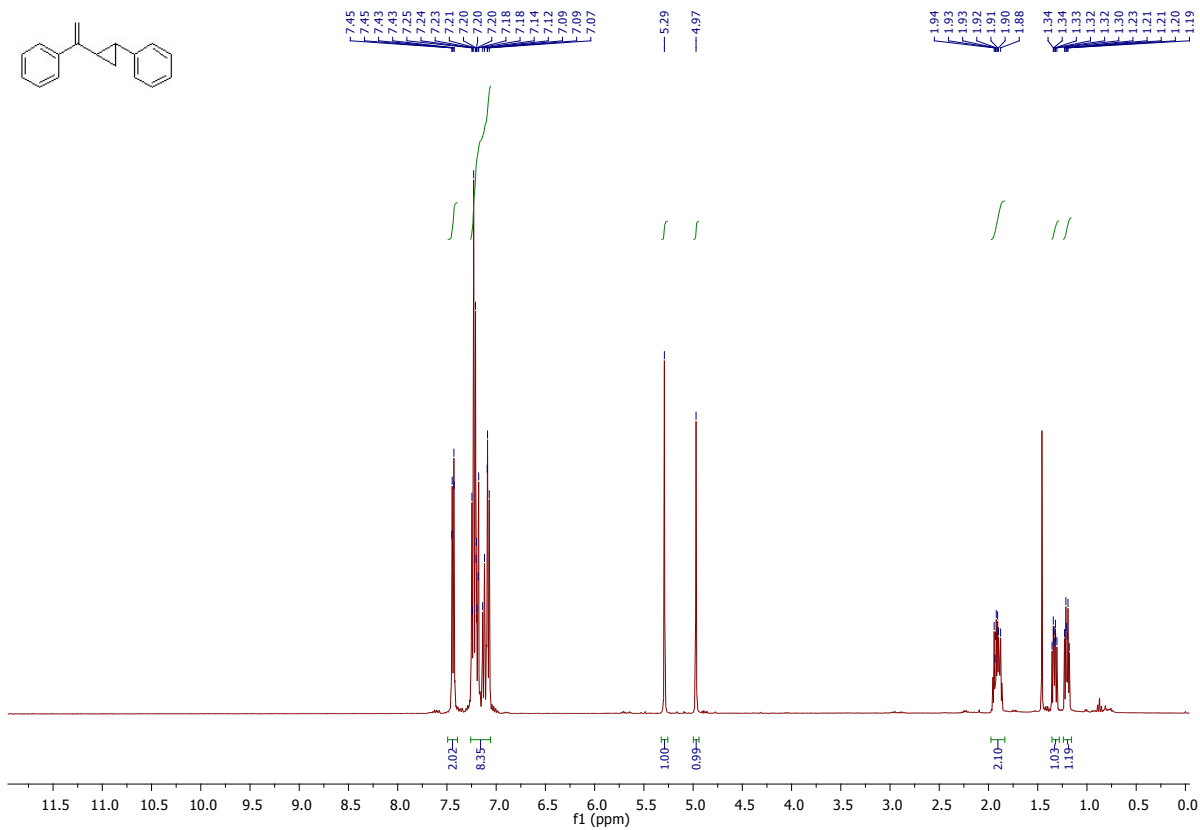

### <sup>13</sup>C NMR spectrum of [1-(2-phenylcyclopropyl)ethenyl]benzene<sup>7</sup>

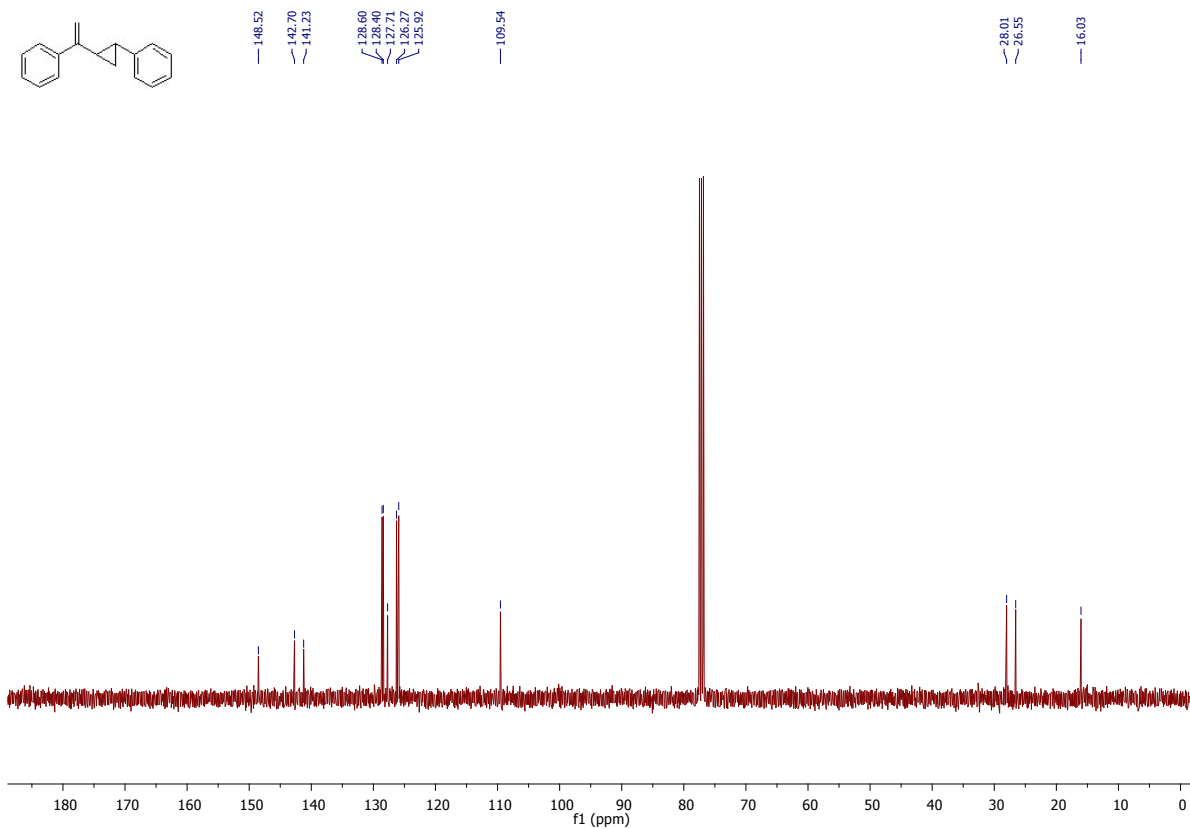



<sup>1</sup>H NMR spectrum of 2-phenyl-2-(2-phenylcyclopropyl)oxirane (2 diastereomers)<sup>8</sup>

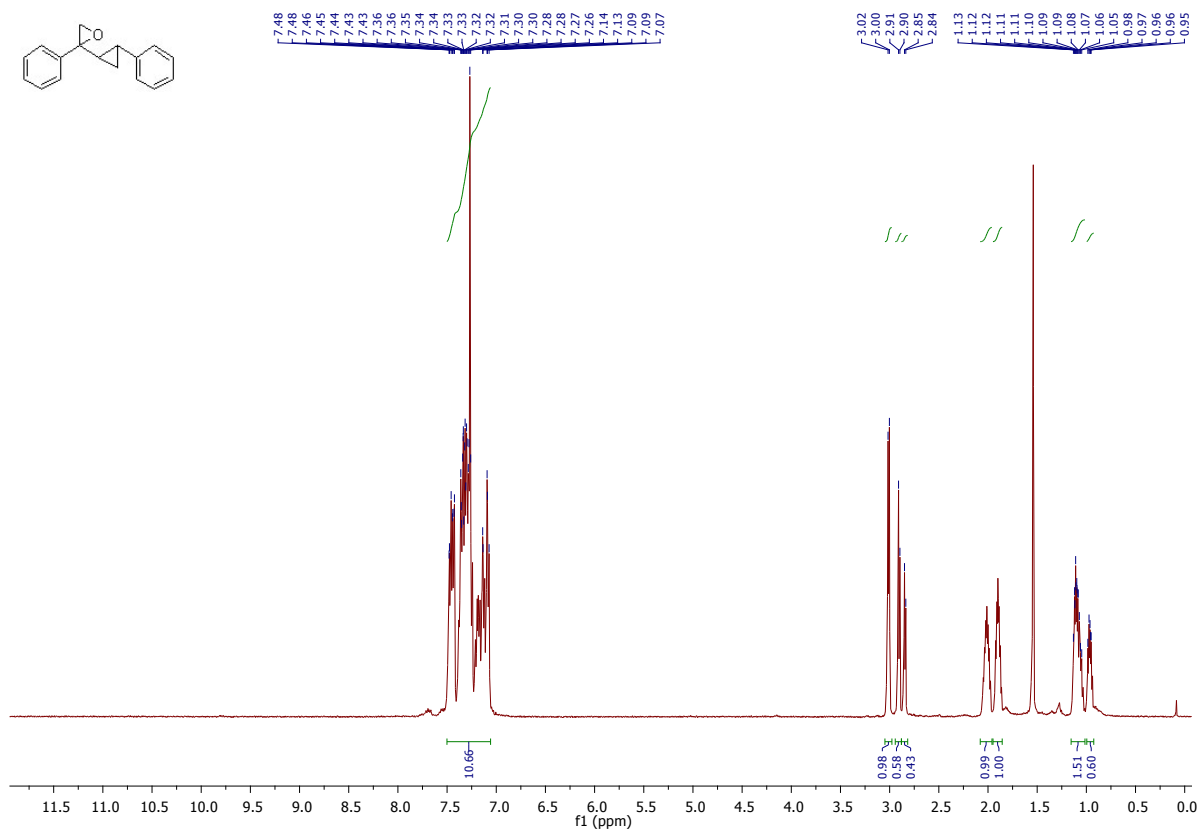

<sup>13</sup>C NMR spectrum of 2-phenyl-2-(2-phenylcyclopropyl)oxirane (2 diastereomers)<sup>8</sup>

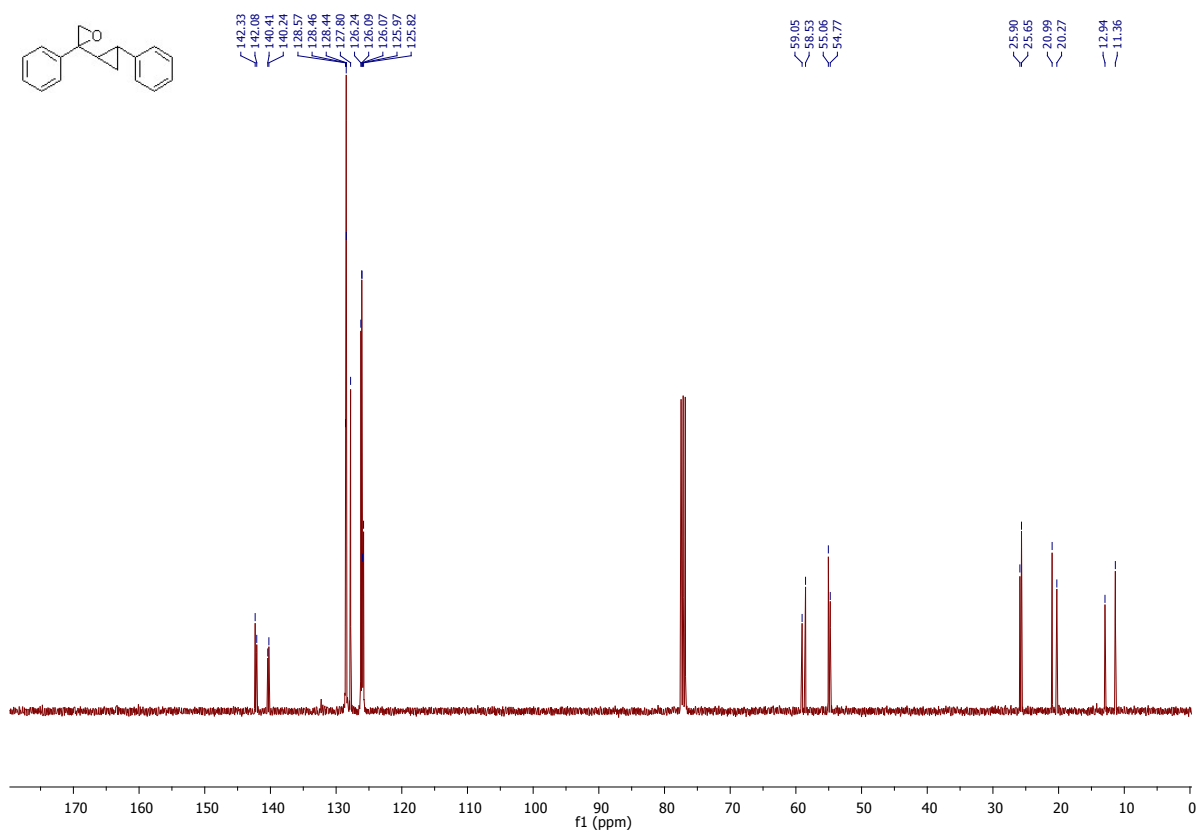

### <sup>1</sup>H NMR spectrum of 2,5-diphenyl-3,6-dihydro-2H-pyran

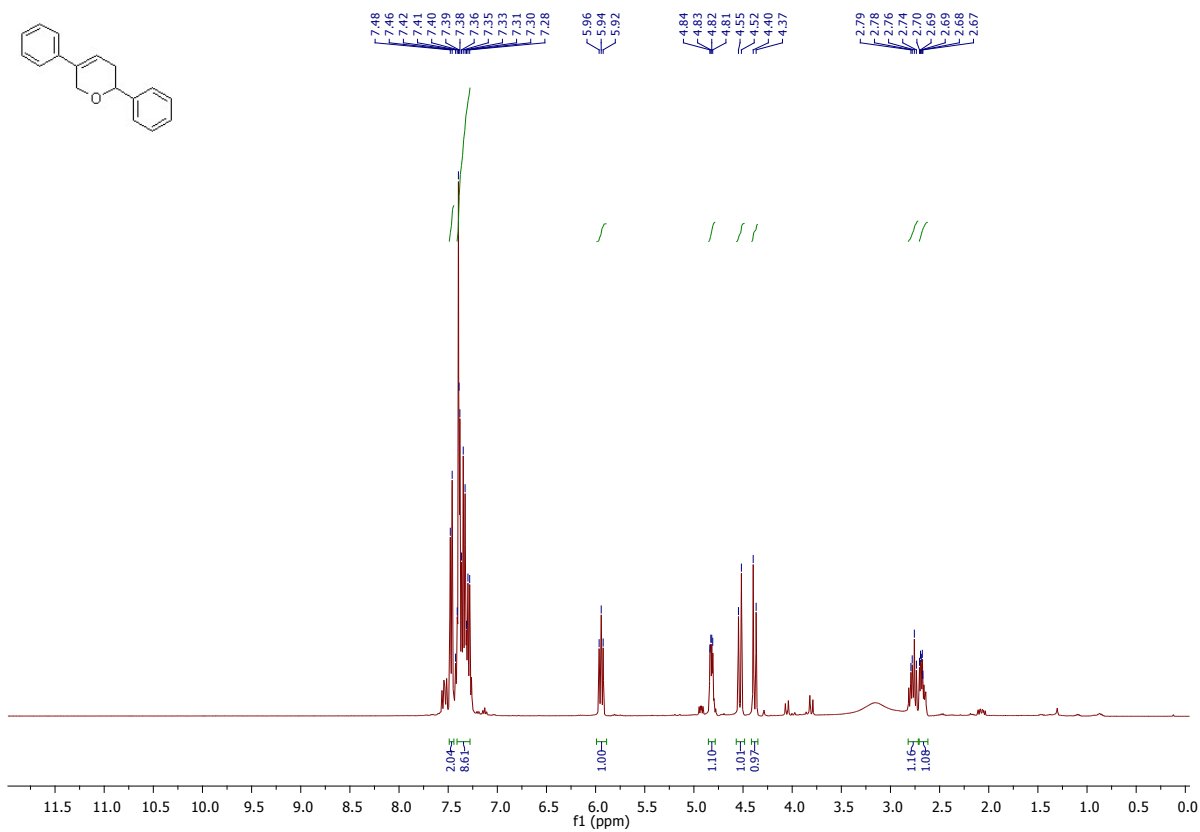

### <sup>13</sup>C NMR spectrum of 2,5-diphenyl-3,6-dihydro-2H-pyran

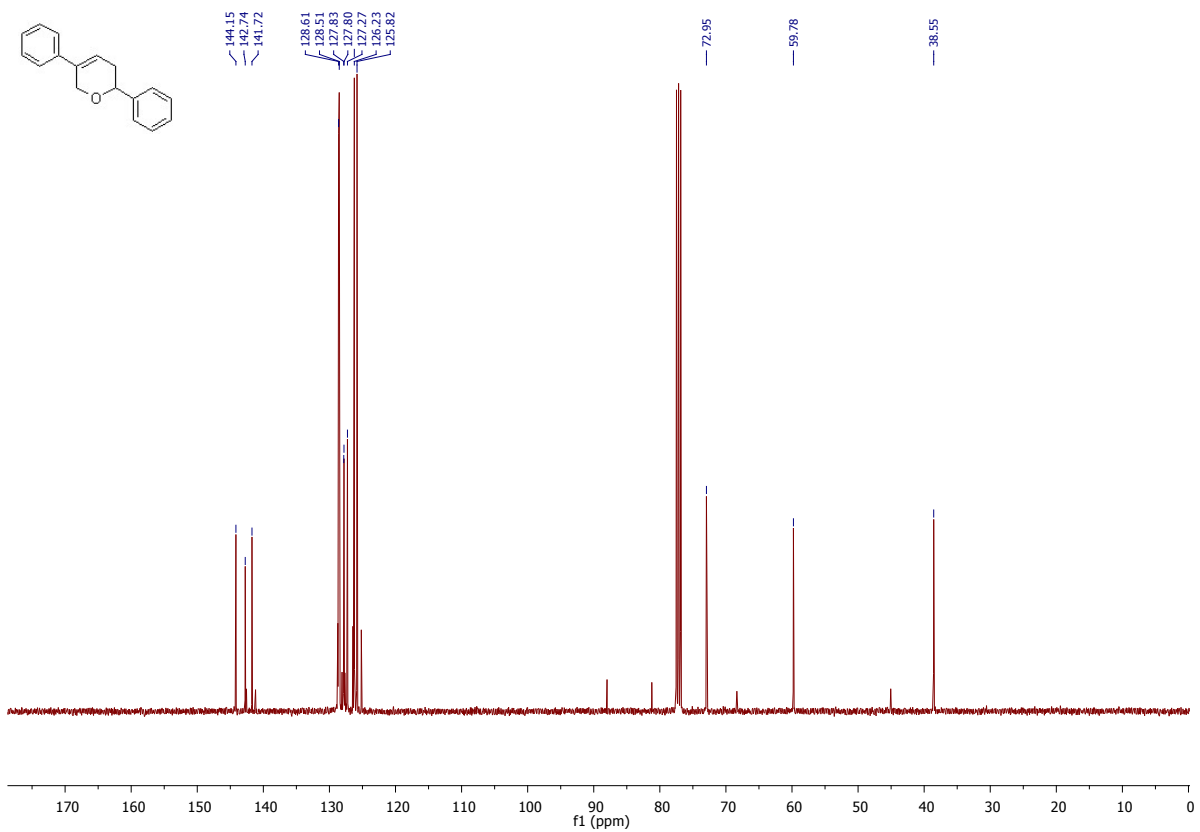

$^1\text{H}$ - $^{13}\text{C}$  NMR spectrum of 2,5-diphenyl-3,6-dihydro-2H-pyran

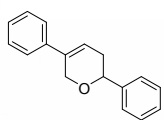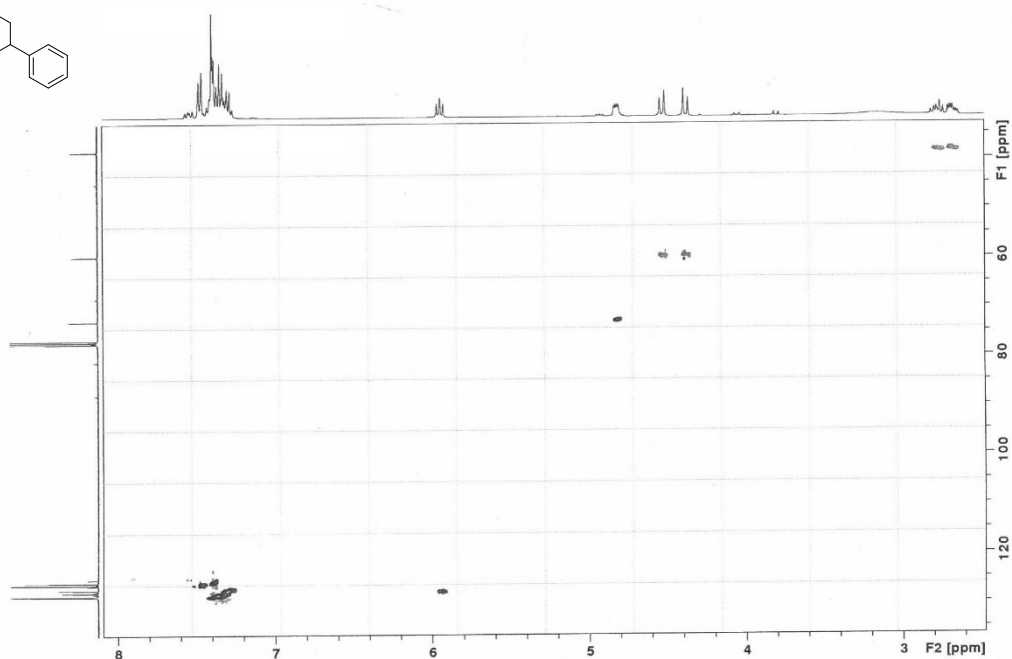

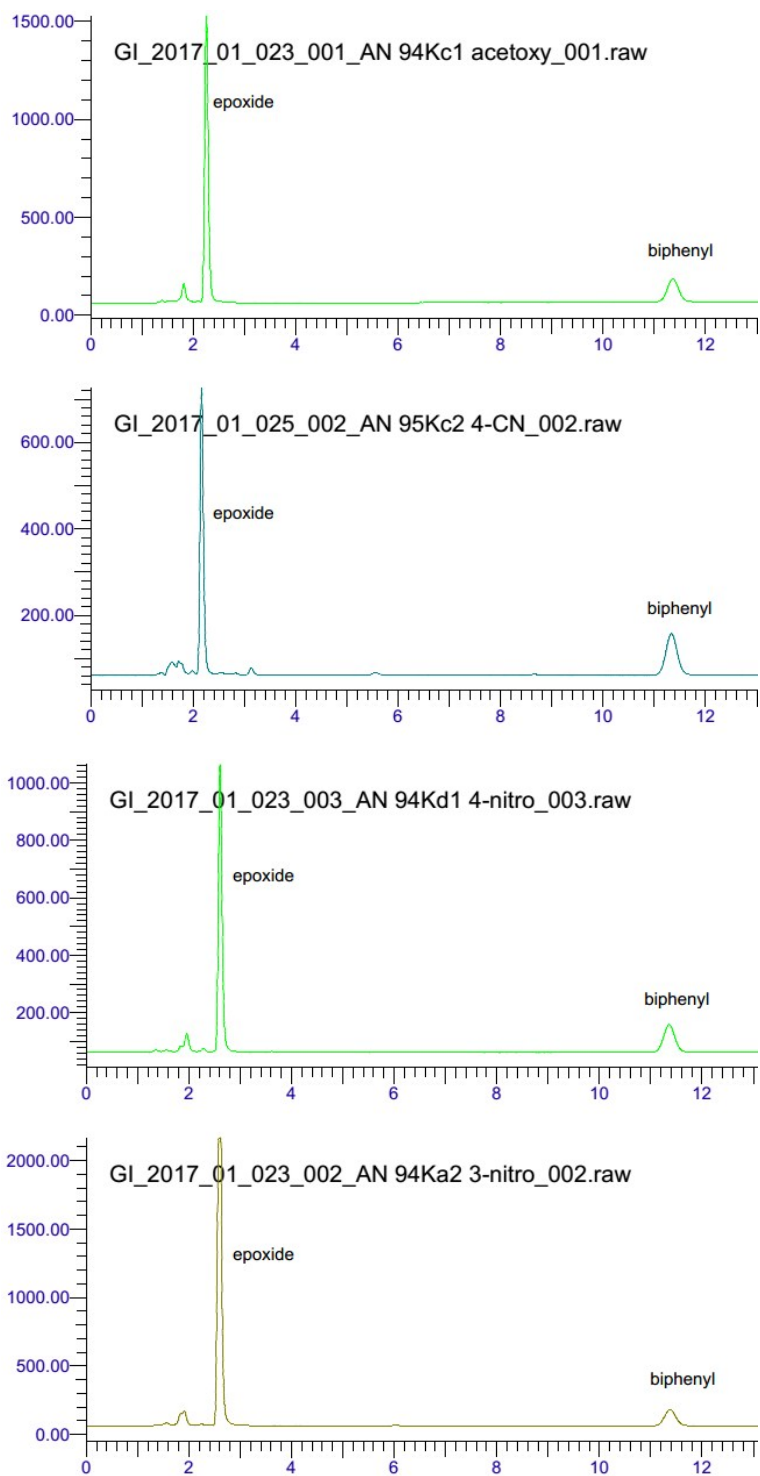

**Figure ES6.** Chromatograms of reaction mixtures of the oxidation of 4-acetoxystyrene, 4-cyanostyrene, 4-nitrostyrene and 3-nitrostyrene.

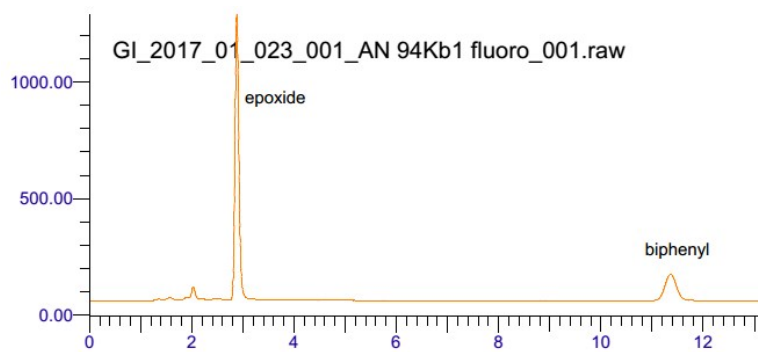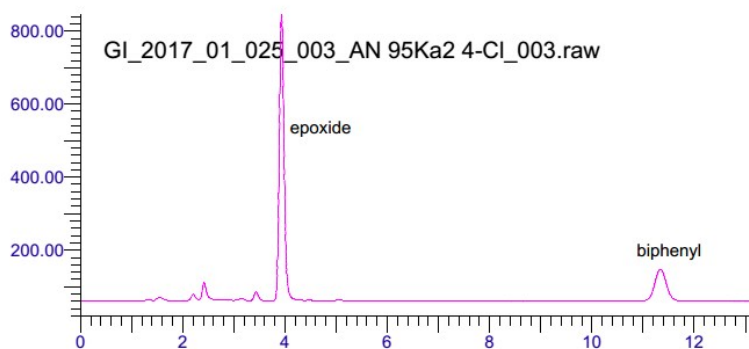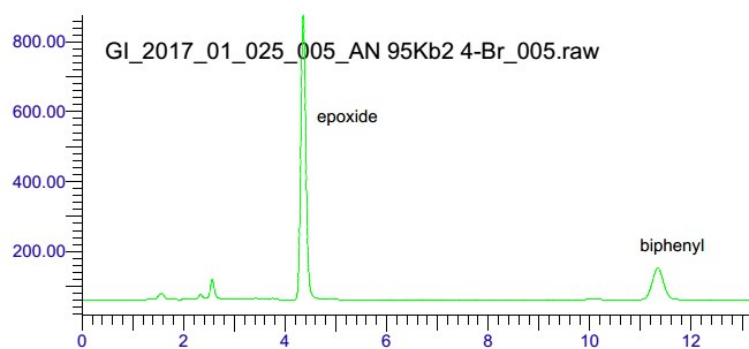

**Figure ES7.** Chromatograms of reaction mixtures of the oxidation of 4-fluorostyrene, 4-chlorostyrene and 4-bromostyrene.

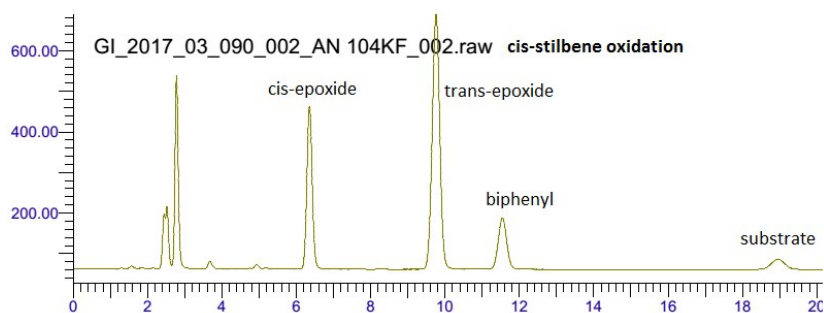

**Figure ES8.** Chromatogram of the reaction mixture of *cis*-stilbene oxidation.

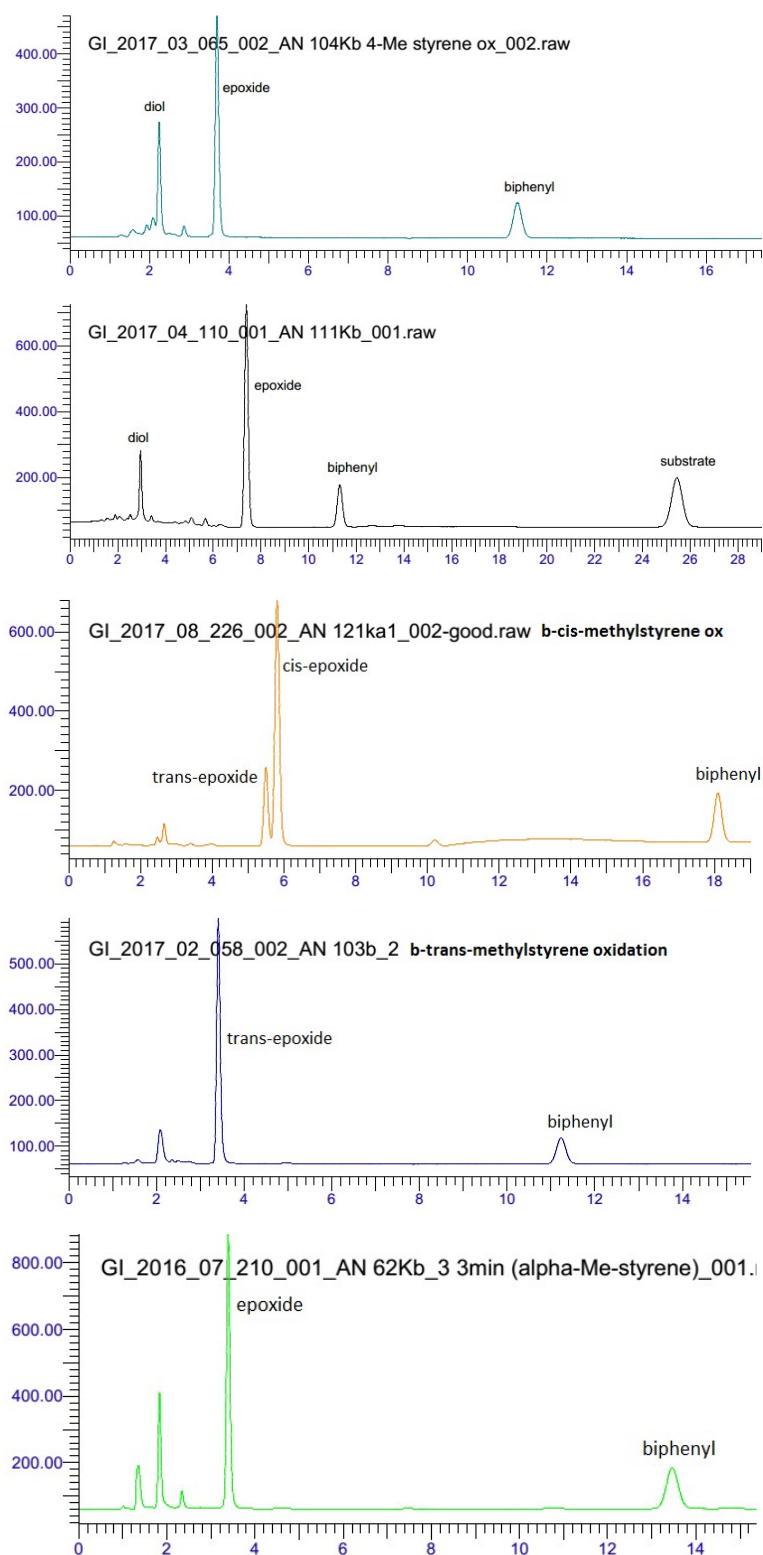

**Figure ES9.** Chromatograms of reaction mixtures of the oxidation of 4-methylstyrene, 2,4,6-trimethylstyrene,  $\beta$ -cis-methylstyrene,  $\beta$ -trans-methylstyrene and  $\alpha$ -methylstyrene.

## Calibrations

Standard solutions of styrene or substituted styrene (0.50 M) in MeCN, corresponding styrene oxide (0.50 M) in MeCN and biphenyl (0.10 M) in MeCN were prepared. Biphenyl solution (500  $\mu\text{L}$ ) was then delivered into six volumetric flasks to which solutions of the corresponding styrene and styrene oxide were added in the following ratios: 1000  $\mu\text{L}$ :0  $\mu\text{L}$ ; 800  $\mu\text{L}$ :200  $\mu\text{L}$ ; 600  $\mu\text{L}$ :400  $\mu\text{L}$ ; 400  $\mu\text{L}$ :600  $\mu\text{L}$ ; 200  $\mu\text{L}$ :800  $\mu\text{L}$ ; 0  $\mu\text{L}$ :1000  $\mu\text{L}$ . The solutions were then diluted with MeCN to give an overall volume of 5.0 mL. Each solution (100  $\mu\text{L}$ ) was then transferred into a HPLC sample vial and diluted with MeCN (1.0 mL) and analysed by HPLC to obtain standard calibration plots.<sup>10</sup> The retention times for epoxides and HPLC conditions are given in Table ES1.

## References

1. T. Chishiro, Y. Kon, T. Nakashima, M. Goto and K. Sato, *Adv. Synth. Catal.*, 2014, **356**, 623–627.
2. P. Fristrup, B. B. Dideriksen, D. Tanner and P. O. Norrby, *J. Am. Chem. Soc.*, 2005, **127**, 13672–13679.
3. S. Berardi, M. Bonchio, M. Carraro, V. Conte, A. Sartorel and G. Scorrano, *J. Org. Chem.*, 2007, **72**, 8954–8957.
4. R. M. Haak, F. Berthiol, T. Jerphagnon, A. J. A Gayet, C. Tarabiono, C. P. Postema, V. Ritleng, M. Pfeffer, D. B. Janssen, A. J. Minnaard, B. L. Feringa and J. G. de Vries, *J. Am. Chem. Soc.*, 2008, **130**, 13508–13509.
5. S. Liao, M. Leutzsch, M. R. Monaco and B. List, *J. Am. Chem. Soc.*, 2016, **138**, 5230–5233.
6. G. Miao, B. E. Rossiter *J. Org. Chem.* 1996, **60**, 8424–8427.
7. P. Brandt, P. O. Norrby, A. M. Daly and D. G. Gilheany, *Chem. Eur. J.*, 2002, **8**, 4299–4307.
8. W. Adam, C. Mock-Knoblach, C. R. Saha-Moller and M. Herderich, *J. Am. Chem. Soc.*, 2000, **122**, 9685–9691.
9. S. V Kostjuk, A. V Radchenko and Gana, *Macromolecules*, 2007, **40**, 482–490.
10. G. Ilyashenko, G. De Faveri, S. Masoudi, R. Al-Safadi and M. Watkinson, *Org. Biomol. Chem.*, 2013, **11**, 1942–1951.
